# Supplementary material
Source: PubMed Central journal article supplement (PMC2708699)
Supplement: 0902366106_0902366106SI.pdf [file 0902366106_0902366106SI.pdf]

# Supporting Information

Crawford et al. 10.1073/pnas.0902366106

## SI Text

**SI Methods. Metabolite and insulin analyses.** Fed and 24-hour-fasting levels of glucose and free fatty acids were measured in sera (or from evaporated chloroform-methanol extracts of liver) by using standard biochemical methods (Wako), as were triglyceride concentrations (Infinity Triglycerides) and insulin (Millipore). Myocardial glycogen assays were performed as described in ref. 3. Briefly, 10 mg of a freeze-clamped ventricle from each mouse was homogenized in 400  $\mu$ L of ice-cold 0.2 M NaOH/1 mM EDTA, and an 80  $\mu$ L aliquot was heated 95 °C for 5 min. For protein concentration and normalization, a 2  $\mu$ L aliquot was added to 0.8 mL water plus 0.2 mL Bradford dye (Bio-Rad), incubated for 10 min at room temperature, and absorbance read at 595 nm. Five microliters of this fresh alkali extract ( $\approx$ 25  $\mu$ g protein) were added to 0.5 mL of glycogen reagent [50 mM sodium acetate, pH 4.6, 0.02% BSA, with and without 5  $\mu$ g/mL *Aspergillus niger* amyloglucosidase (Roche, 14 units/mg)]. The mixture was subsequently incubated for 30 min at 25 °C. One-half milliliter of glucose reagent [100 mM Tris-HCl, pH 8.1, 2 mM MgCl<sub>2</sub>, 1 mM DTT, 1 mM ATP, 0.2 mM NADP<sup>+</sup>, 5  $\mu$ g/mL *Leuconostoc mesenteroides* glucose 6-phosphate dehydrogenase (Calbiochem, 220 units/mg), and 20  $\mu$ g/mL *Saccharomyces cerevisiae* hexokinase (Sigma, 250 units/mg)] was added and the mixture incubated for 30 min at 25 °C. The NADPH generated from NADP<sup>+</sup> was measured fluorometrically (excitation, 360 nm; emission, 460 nm).

**Transmission EM studies of myocardial mitochondrial morphology.** Ventricles were dissected from CO<sub>2</sub>-euthanized animals, rapidly diced into 2–3-mm<sup>3</sup> pieces, washed in PBS, and fixed overnight at 4 °C in a solution containing 2% paraformaldehyde, 2.5% glutaraldehyde, and 1% tannic acid (prepared in 0.1 M cacodylic acid, pH 7.2). After multiple rinses in 0.1 M cacodylic acid, samples were fixed in 1% osmium tetroxide/0.1 M cacodylic acid for 1 h, stained for 1 h in 1% uranyl acetate (prepared in distilled, deionized water), dehydrated through a series of graded ethanols and propylene oxide, and then infiltrated with and embedded in monomeric Embed 812 (Electron Microscopy Sciences). Seventy-five-nanometer-thick sections were cut from each block, placed on grids, stained with Reynolds' lead citrate/1% uranyl acetate, and viewed under a Hitachi H7500 transmission electron microscope.

**Mitochondrial qPCR.** Hearts were dissected from CO<sub>2</sub>-euthanized animals and snap-frozen in liquid N<sub>2</sub>. Ventricular samples ( $\approx$ 10 mg) were cut on dry ice by using a razor blade. Each sample was placed in 75  $\mu$ L of lysis solution (25 mM NaOH, 0.2 mM EDTA, pH 12), incubated at 94 °C for 20 min, and then cooled to 4 °C for 5 min. Seventy-five microliters of neutralization solution (40 mM Tris-HCl, pH 5) was subsequently added, and a 1- $\mu$ L aliquot of this mixture was used as template for qPCR. The ratio of mitochondrial DNA (mtDNA) to nuclear DNA (nDNA) was determined by using primers against mt*Cytb* (mtDNA) and *Rpl32* (nDNA) (Table S6). The mtDNA/nDNA ratio was arbitrarily set at 1 for fed GF hearts.

**In vitro assays of mitochondrial respiration.** Myocardial mitochondria were isolated from CO<sub>2</sub>-euthanized mice by sucrose gradient centrifugation (1). Briefly, ventricles were excised, rinsed in ice-cold Mitochondrial Isolation Medium (MIM, 10 mM Na HEPES, pH 7.2, 300 mM sucrose, 0.2 mM EDTA), and minced with fine scissors in a dry Petri dish (maintained on ice). The minced tissue from each heart was incubated for 15 min at 4 °C in 5 mL of bovine pancreatic trypsin (Sigma; specific activity  $\geq$ 9,000 Na-Benzoyl-L-Arginine Ethyl Ester (BAEE) units/mg

protein; 125  $\mu$ g/mL MIM). Five milliliters of ice-cold MIM (pH 7.4) containing BSA (Sigma; 1 mg/mL) and soybean trypsin inhibitor (Sigma; 650  $\mu$ g/mL) was subsequently added to the preparation. Tissue fragments were then allowed to settle by gravity, the supernatant was removed, and fresh ice-cold MIM-BSA (pH 7.4) was added. The samples were subsequently homogenized on ice by using a Glas-Col dounce homogenizer, and centrifuged at 600  $\times$  g for 10 min at 4 °C. The resulting supernatant, which contained mitochondria, was spun at 8,000  $\times$  g for 15 min at 4 °C, the supernatant discarded, the mitochondrial pellet resuspended in 10 mL of ice-cold MIM-BSA, and the sample centrifuged again at 8,000  $\times$  g for 15 min at 4 °C. The pellet was briefly washed in ice-cold MIM, and resuspended in 75  $\mu$ L of ice-cold MIM (pH 7.2) per heart. Mitochondrial preparations were maintained on ice and used for respiration assays on the same day as the isolation. Protein content was quantified by Bradford assay (Bio-Rad); 0.5 mg of mitochondrial protein was used for each respiration assay.

Respiration assays were performed at 37 °C by using a water-jacketed Clark electrode (Hansatech Instruments) and conditions described previously (2). Briefly, 1 mL of respiration buffer (20 mM HEPES, pH 7.1, 125 mM KCl, 3 mM magnesium acetate, 5 mM KH<sub>2</sub>PO<sub>4</sub>, 0.4 mM EGTA, 0.3 mM DTT, 2 mg BSA per mL) was used to supply one of 2 substrate combinations: (i) 20  $\mu$ M palmitoyl-L-carnitine plus 5 mM malate; or (ii) 10 mM pyruvate plus 5 mM malate. The solubility of oxygen in the respiration buffer at 37 °C was 235 nmol O<sub>2</sub> per mL. Following measurement of basal (state 2) respiration, 1 mM ADP was added to isolated mitochondria in respiration buffer, and maximal (state 3) respiration defined. Thereafter, state 4 (ADP-depleted) respiration was mimicked by adding 1  $\mu$ g/mL oligomycin (Sigma) to inhibit ATP synthase.

**Western blots.** Snap-frozen specimens consisting of both ventricles from a given animal were homogenized (Teflon pestle) in 2 mL of ice-cold tissue extraction buffer [20 mM Tris, pH 7.5; 150 mM NaCl, 1 mM EDTA, 1% Triton X-100, plus protease inhibitor mixture (Roche) and phosphatase inhibitors (Sigma)]. Cellular debris were removed by centrifugation (12,000  $\times$  g at 4 °C for 15 min) and the protein concentration of the resulting supernatant was determined (bicinchoninic acid assay; Pierce). Twenty micrograms of protein were loaded per lane of SDS/PAGE gel and transferred to PVDF membranes (Invitrogen). Membranes were treated with blocking buffer [5% nonfat dry milk in Tris-buffered saline plus 0.1% Tween-20 (TBST)], washed in TBST, and then incubated overnight at 4 °C with rabbit polyclonal antibodies against phospho-Akt1 (Ser-473), phospho-AMPK $\alpha$  (Thr-172), total Akt, total AMPK $\alpha$  (Cell Signaling Technologies) or actin (Sigma) in a solution of 5% BSA/TBST (all primary antibodies were diluted 1:1,000). After washing in TBST, membranes were incubated in donkey anti-rabbit sera conjugated to horseradish peroxidase (diluted 1:5,000 in TBST; GE Healthcare), washed again in TBST, and incubated in ECL Plus reagents (GE Healthcare). Following exposure of film, band intensity was quantified (QuantityOne software package; Bio-Rad).

**Echocardiography.** Transthoracic echocardiography was performed under light anesthesia (Avertin; 0.05 mg/g body weight, administered i.p.). An Acuson Sequoia 256 Echocardiography System equipped with a 13-MHz linear array ultrasound transducer was used to acquire images. The parasternal long-axis image was used to measure maximum left ventricle (LV) length. Five to seven consecutive 2D short-axis images of the LV were

obtained at several levels along the longitudinal axis (from the base to the apex of the heart) by using established anatomical landmarks. Endocardial and epicardial borders were traced by using electronic calipers. LV volumes were calculated by adding the volumes of each short-axis cross-sectional slab. In addition to the standard parameters determined by 2D-guided M-mode, Doppler indices of diastolic function were obtained, including transmitral flow velocities of E waves (i.e., the velocity of blood flow between the left atrium and ventricle in early diastole), plus tissue Doppler imaging (TDI) of mitral valve apparatus displacement [ $E'$  (4)]. Assessment of Doppler waveforms required administration of a sinus node inhibitor (Zatebradine, 0.01 mg/g i.p.).

**Exercise training of gnotobiotic mice in gnotatoria.** A swimming protocol was developed for gnotobiotic mice that allowed them to remain in their isolators for the duration of the training period. The isolators contained autoclaved plastic mouse-cage bottoms that were used as swimming tanks. During training sessions, a circulating water-heating pad was placed under the swimming tanks on the outside of the flexible film (Trexler-style) gnotobiotic isolator. On a twice-daily basis, tap water was autoclaved in glass bottles, which were then closed tightly and transported, while still warm, through the gnotobiotic isolator port, in a mist of sterilizing aerosolized chlorine dioxide (Clidox-S, Pharmacal Research Technologies, Inc.). Once the autoclaved water was poured into the swimming tanks and the temperature confirmed to be 32–35 °C, 2–3 gnotobiotic mice were placed into each tank [a total of 5 germ-free (GF) and 5 “conventionalized” (CONV-D) mice were subjected to this exercise regimen, in separate gnotobiotic isolators].

On the first day of the protocol, animals swam in two 10-min sessions separated by a 3-h interval. On subsequent days, the duration of each swimming session was increased in 10-min increments, until 90-min sessions were achieved twice per day. Thereafter, this level of exercise was sustained for a total of 30 days, 5 days per week (weekdays only). During the incremental phase of the protocol, the swimming duration was maintained at the Friday level on the following Monday before increasing again. Echocardiograms were performed on the day the mice were killed, which occurred on the morning immediately after the thirtieth day of exercise.

**Determination of lean mass.** Unanesthetized mice were gently placed into a plastic cylinder tube that was then inserted into an Echo MRI (Echo Medical Systems) for determination of total, lean, and adipose mass. Routine measurements required no more than 1 min of data collection per animal.

**16S rRNA-based enumeration studies of the gut microbiota.** Four groups of CONV-D mice were studied: controls consuming the CARB diet, fasted animals who had been subjected to 24 h of withdrawal from the CARB diet, mice that had consumed the high-fat, low-carbohydrate ketogenic diet for 30 days, and mice that had been trained by swimming in the gnotatorium for 30 days while consuming the standard low-fat, polysaccharide-rich chow CARB diet ( $n = 4$ –5 animals per group, per experiment).

Cecal contents were harvested from each animal at the time of death and rapidly frozen in liquid N<sub>2</sub>. Samples (100 mg) were suspended in 500  $\mu$ L of buffer A (200 mM Tris, pH 8.0, 200 mM NaCl, 20 mM EDTA), followed by addition of 210  $\mu$ L of 20% SDS, and 500  $\mu$ L of a 1:1 mixture of phenol/chloroform. Five-hundred microliters of zirconium beads were added to each tube, which were then placed in a bead beater (Biospec; highest setting for 2 min). The mixture was then spun at 6,000  $\times$  g at 4 °C for 3 min and DNA was purified from the resulting supernatant by phenol/chloroform extraction followed by ethanol precipitation.

The cecal microbiota of CONV-D mice were compared by using multiplex pyrosequencing of error-correcting, barcoded amplicons, generated from the V2 region their bacterial 16S

rRNA genes (5). A total of 145,428 reads that passed quality control (6) were generated from the 38 samples that yielded sufficient PCR products (range = 984–24,156 reads per sample).

The degree of similarity of the different gut communities was measured by using the UniFrac metric. Sequence reads were grouped into operational taxonomic units (OTUs) based on a threshold cutoff of  $\geq 97\%$  identity (7). A phylogenetic tree was built from one representative sequence from each OTU by using Clearcut’s relaxed neighbor joining implementation with the Kimura 2-parameter correction for distances (8) and the tree used for unweighted and weighted UniFrac analysis (the latter takes into account abundance of phylotypes). A matrix of UniFrac distance measurements for all pairwise comparisons of communities was constructed and used to generate Principal Coordinates Analysis (PCoA) plots (9). Samples were analyzed in 2 ways: By using all reads or a maximum of 1,000 randomly selected reads.

**SI Results: Functional Genomic Studies of Myocardial Physiological Hypertrophy.** GeneChip datasets disclosed that the significantly increased myocardial mass observed in CARB-fed CONV-D compared with GF animals is not associated with significant changes in expression of biomarkers of “pathological” cardiac hypertrophy, such as Acta1 ( $\alpha$ -skeletal muscle actin), Myh7 ( $\beta$ -myosin heavy chain), Nppa and Nppb (atrial and brain natriuretic peptides, respectively), Ednra and Ednrb (endothelin receptor types A and B, respectively), Ucp2 (uncoupling protein 2), Ace (angiotensin converting enzyme), and Adrbk1/GRK2 ( $\beta$ -adrenergic receptor kinase 1) (10). Therefore, we determined whether the functional genomic differences between CARB-fed GF and CONV-D mice were differences that are also seen in the context of “physiological hypertrophy”.

To address this question, we began with the GeneChip dataset comparison shown in Fig. S7A, which yielded a list of 170 genes that were significantly up- or down-regulated in the heart after conventionalization (Fig. S7B and Table S5). This comparison was organized as follows: (i) dChip was first used to generate a list of genes that were up- or down-regulated  $\geq 1.5$ -fold in the hearts of wild-type versus *Ppara*<sup>-/-</sup> GF or CONV-D mice; (ii) the resulting set of genes was then queried for those that exhibited a statistically significant 1.2-fold difference between wild-type GF and CONV-D hearts. All genes that emerged from these comparisons met the following criteria: Their fold-differences in expression between the experimental and control groups had a lower-bound 90% confidence interval; the *P* value (Student’s *t* test) for the observed fold-difference in expression was  $< 0.05$ ; the gene was called present in 100% of the RNA samples where higher relative expression was observed; the minimal intensity after normalization of signals across the GeneChips was  $> 100$  (note that the normalized mean signal intensity was set at 500); and the false discovery rate was  $< 1\%$ .

Ingenuity Pathways Analysis (IPA) of the resulting list of 64 genes whose expression was significantly higher in the hearts of CARB-fed CONV-D versus GF mice indicated that they were significantly enriched in functions (pathways) related to fatty acid and lipid metabolism,  $\beta$ -alanine metabolism, propanoate metabolism, branch-chain amino acid metabolism, and antigen presentation. On the other hand, the list of 106 genes whose expression was significantly higher in the hearts of GF animals were enriched in functions related to actin cytoskeleton signaling, extracellular matrix–receptor interaction, cell adhesion, integrin signaling, vascular development, and leukocyte extravasation.

To determine whether these differences share features with changes that occur with the physiological hypertrophy that normally takes place when conventionally raised mice are exercised, we turned to GeneChip datasets deposited by the Cardigenomics consortium from their studies of the hearts of

untrained conventionally raised (CONV-R) FVB/N female mice that swam for just 10 min (control) versus those subjected to a 4-week-long swimming regimen ([http://cardiogenomics.med.harvard.edu/groups/proj1/pages/download\\_swim.html](http://cardiogenomics.med.harvard.edu/groups/proj1/pages/download_swim.html)).

When we evaluated the Cardiogenomics dataset by using IPA, we found that the group of 114 significantly up-regulated genes in trained versus untrained CONV-R mice was enriched in a number of the pathways that were also enriched in the 64 up-regulated genes culled from our comparison of the hearts of untrained CARB-fed CONV-D versus GF mice. These pathways included fatty acid metabolism, branch-chain amino acid deg-

radation, and propanoate metabolism. The same was true of the 106 down-regulated genes culled from our comparison of untrained CONV-D versus GF animals. Enriched pathways that were common to this comparison and the comparison of trained versus untrained CONV-R mice included actin cytoskeleton, integrin signaling, and leukocyte extravasation. Taken together, these findings led us to conclude that the increase in myocardial mass that occurs when GF mice are colonized is accompanied by transcriptional responses that are similar to those encountered during physiological hypertrophy.

1. Boehm EA, et al. (2001) Increased uncoupling proteins and decreased efficiency in palmitate-perfused hyperthyroid rat heart. *Am J Physiol* 280:H977–H983.
2. Lehman JJ, et al. (2008) The transcriptional coactivator PGC-1alpha is essential for maximal and efficient cardiac mitochondrial fatty acid oxidation and lipid homeostasis. *Am J Physiol* 295:H185–H196.
3. Lin SS, Manchester JK, Gordon JI (2001) Enhanced gluconeogenesis and increased energy storage as hallmarks of aging in *Saccharomyces cerevisiae*. *J Biol Chem* 276:36000–36007.
4. Chiu HC, et al. (2005) Transgenic expression of fatty acid transport protein 1 in the heart causes lipotoxic cardiomyopathy. *Circ Res* 96:225–233.
5. Hamady M, et al. (2008) Error-correcting barcoded primers for pyrosequencing hundreds of samples in multiplex. *Nat Methods* 5:235–237.
6. Fierer N, et al. (2008) Short-term temporal variability in airborne bacterial and fungal populations. *Appl Environ Microbiol* 74:200–207.
7. Ley RE, et al. (2008) Evolution of mammals and their gut microbes. *Science* 320:1647–1651.
8. Sheneman L, Evans J, Foster JA (2006) Clearcut: A fast implementation of relaxed neighbor joining. *Bioinformatics* 22:2823–2824.
9. Lozupone C, Knight R (2005) UniFrac: A new phylogenetic method for comparing microbial communities. *Appl Environ Microbiol* 71:8228–8235.
10. Dorn GW, II (2007) The fuzzy logic of physiological cardiac hypertrophy. *Hypertension* 49:962–970.

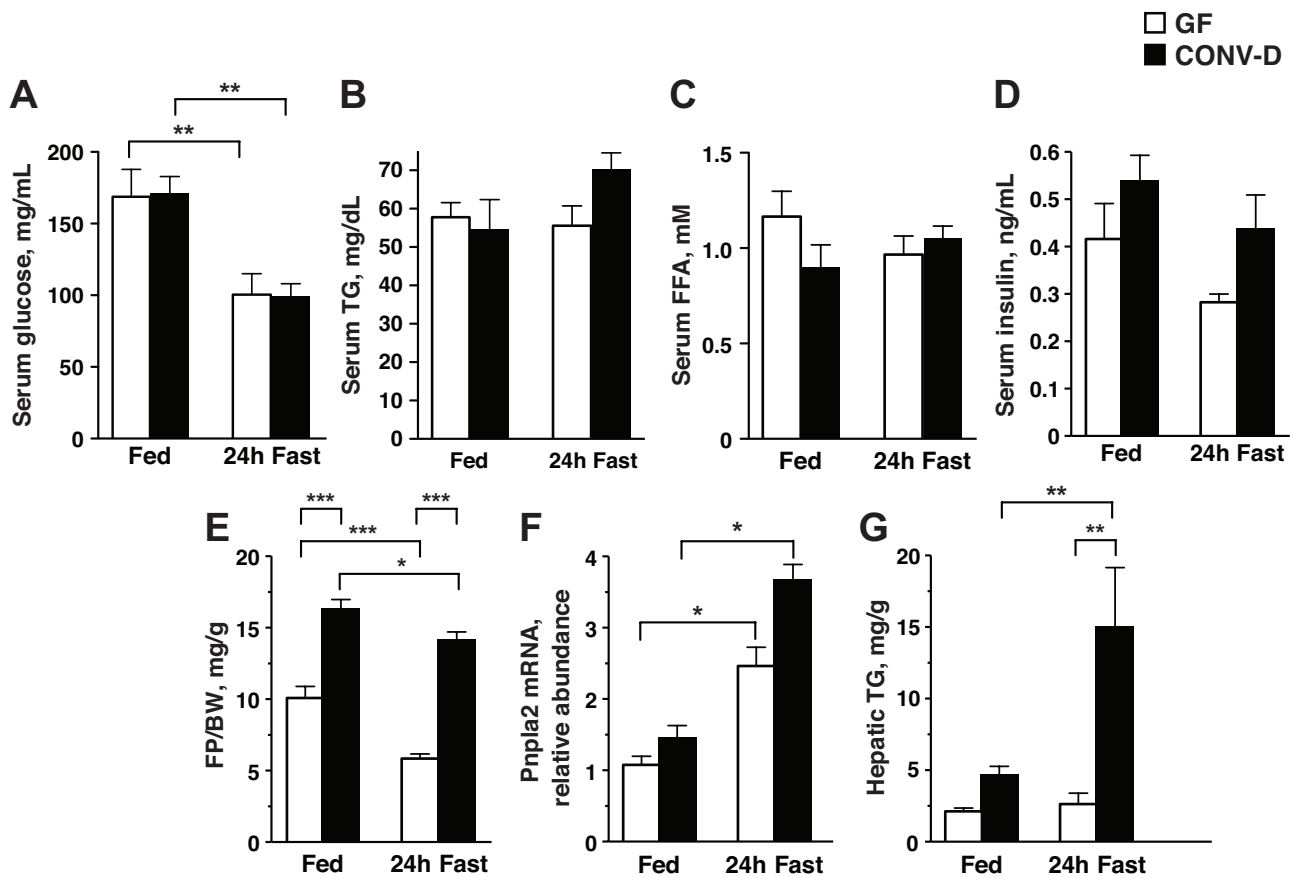

**Fig. S1.** Key metabolites and effectors of insulin signaling and lipid mobilization in fed and fasted GF and CONV-D wild-type C57BL/6J mice. Mice were fed the standard CARB diet. (A–D) Serum glucose (A), triglycerides (TG) (B), and free fatty acids (FFA) (C) and insulin (D) were measured (mean values  $\pm$  SEM;  $n = 10$  animals per treatment group). (E) Epididymal fat pad (FP) to body weight (BW) ratio. Both fat pads were measured per animal and the values combined to calculate the FP/BW ( $n = 10$  mice per treatment group). (F) qRT-PCR assays of Pnpla2 mRNA levels in epididymal fat pads; data were normalized to the levels of Rp132 by using the  $\Delta\Delta C_T$  method ( $n = 5$  animals per treatment group). (G) Hepatic triglyceride levels (expressed as mg per weight of liver;  $n = 5$  mice per group). \*,  $P < 0.05$ ; \*\*,  $P < 0.01$ ; \*\*\*,  $P < 0.001$  (2-way ANOVA with posthoc Bonferroni test).

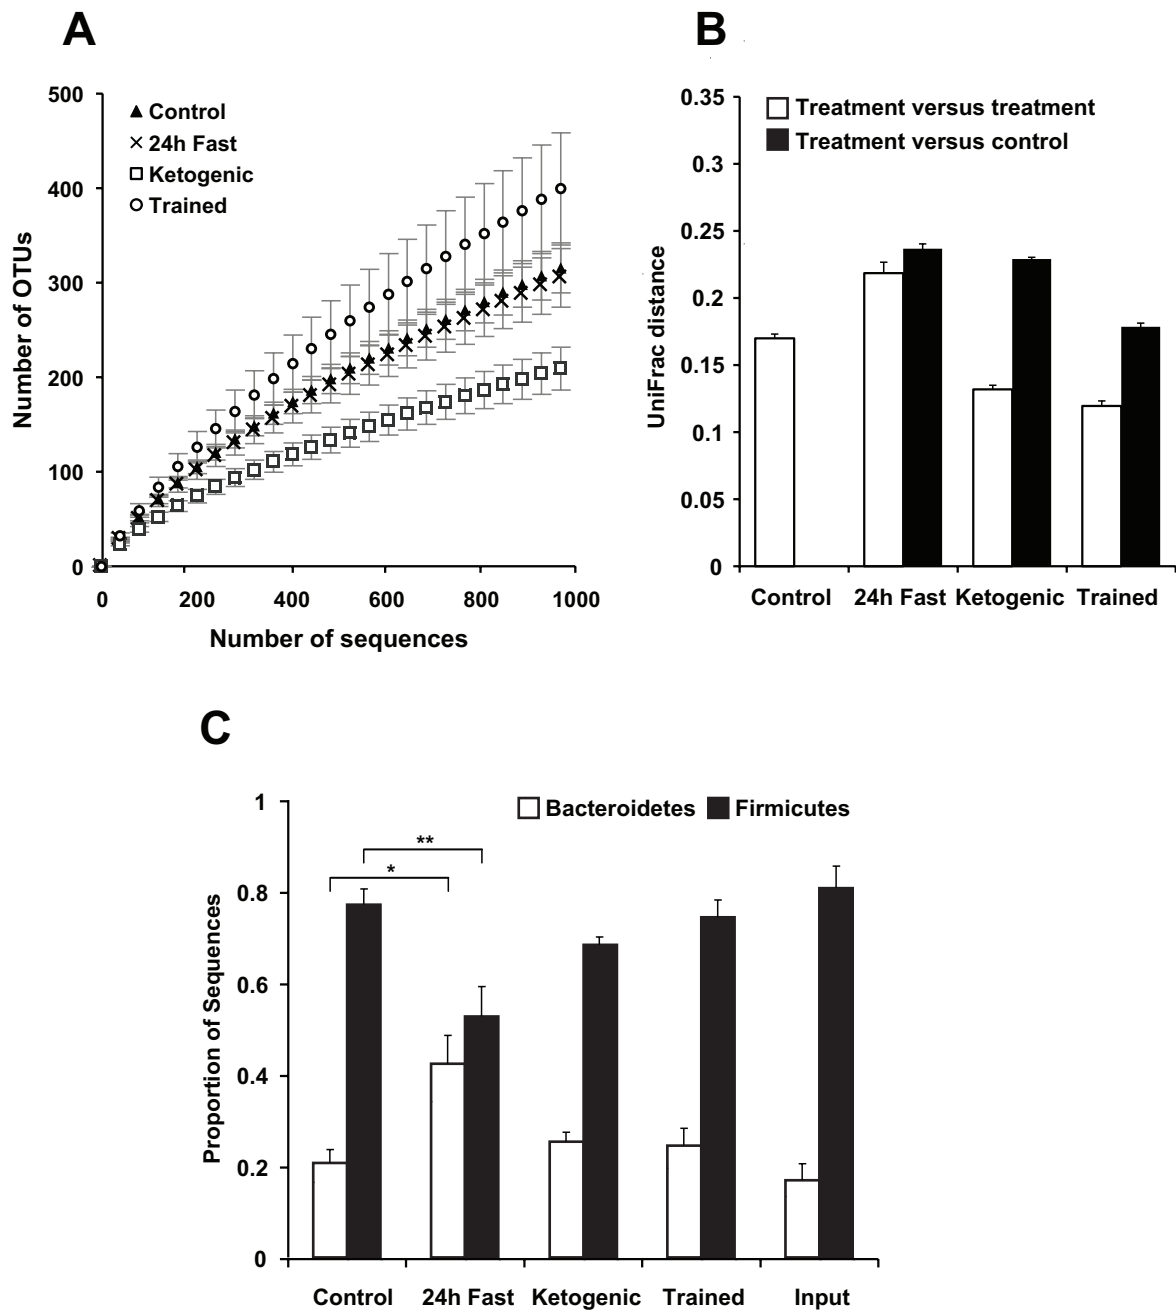

**Fig. S2.** 16S rRNA-based analysis of the effects of fasting, a ketogenic diet, or exercise on the cecal microbiota of CONV-D mice. (A) Rarefaction curves used to estimate bacterial diversity in the cecal microbiotas of CARB-fed control, 24-h fasted, ketogenic diet-fed and CARB-fed trained individuals (mean  $\pm$  95% confidence interval shown). The number of species-level phylotypes identified are plotted on the y axis ("species" defined as organisms sharing  $\geq$ 97% sequence identity in their 16S rRNA genes). (B) Average pairwise weighted UniFrac distance (a phylogeny-based measure of differences in community composition) for comparisons of individuals within a treatment (white bars) and comparisons of individuals between treatment versus CARB-fed untrained controls (black bars) [1,000 sequences per individual; Student's *t* test with Monte Carlo: 24-h fast (ns), ketogenic diet ( $P < 0.001$ ), training ( $P < 0.01$ )]. (C) Proportional abundance of the Bacteroidetes and Firmicutes in the cecal microbiota of mice belonging to different treatment groups (mean  $\pm$  SEM). "Input" refers to the cecal communities from conventionally raised donors that were transplanted to recipient germ-free mice. "Control" denotes conventionalized (CONV-D) recipients of the microbiota transplant who were consuming a standard polysaccharide-rich chow diet, and who were not subjected to exercise training in the gnotatorium. \*,  $P = 0.01$ ; \*\*,  $P = 0.007$  by 2-tailed Student's *t* test with unequal variance.

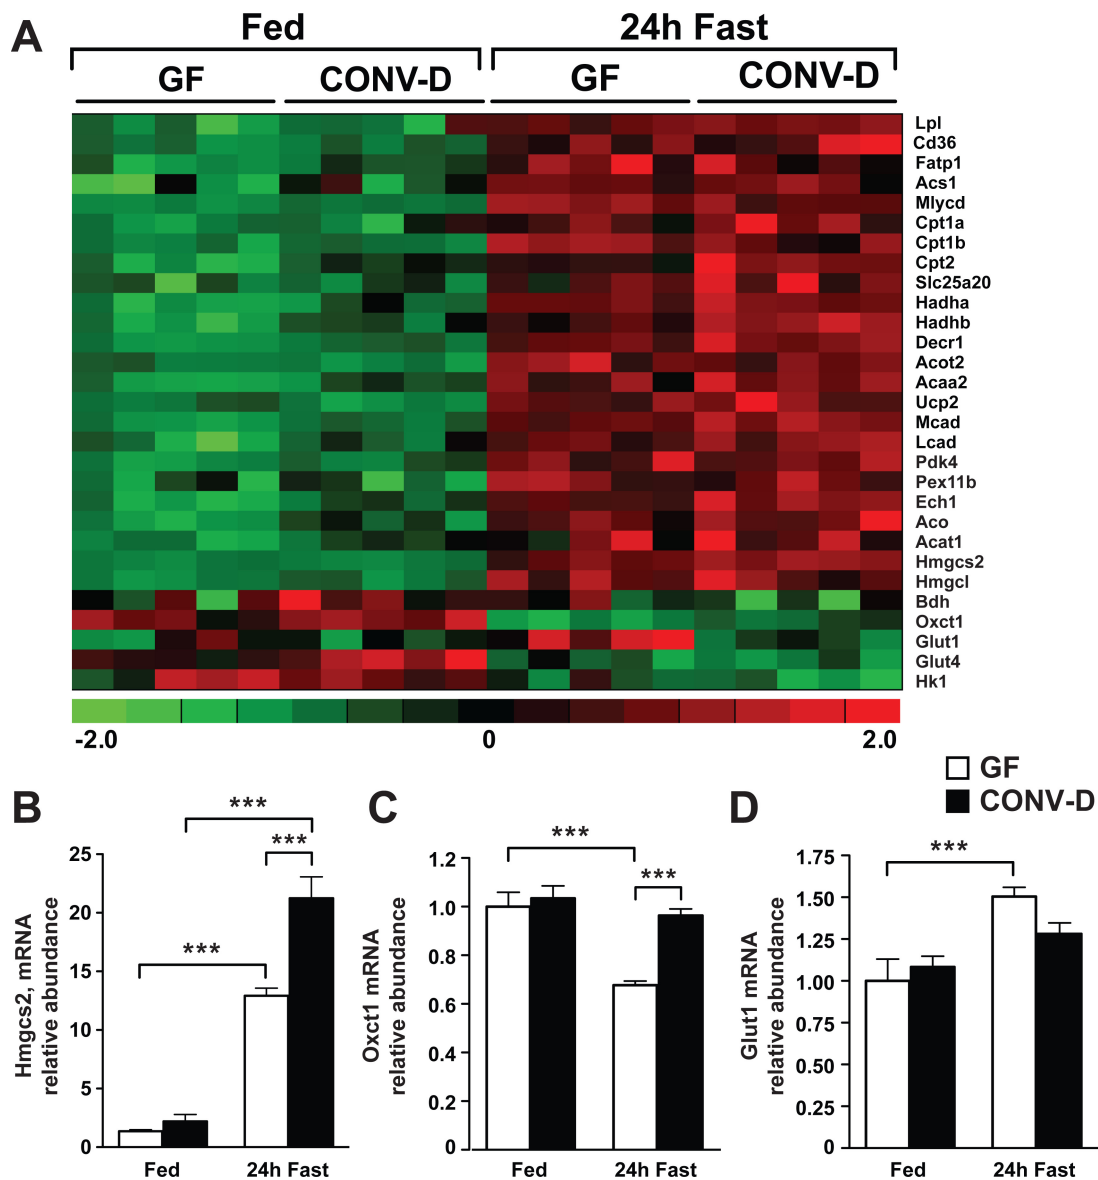

**Fig. S3.** Transcriptional response of the myocardium to a 24-h fast in GF versus CONV-D animals. (A) GeneChip analysis of genes that encode mediators of fatty acid oxidation, ketone body metabolism, and glucose uptake in CARB-fed and fasted GF and CONV-D mice. Red, up-regulated; green, down-regulated. Color key at the bottom of the heatmap indicates the standard deviation from the mean value across all samples. (B–D) qRT-PCR assays of selected transcripts in the hearts of GF and CONV-D CARB-fed and fasted animals. Values are expressed relative to GF CARB-fed controls. \*\*,  $P < 0.01$ ; \*\*\*,  $P < 0.001$  (2-way ANOVA);  $n = 5$  animals per condition.

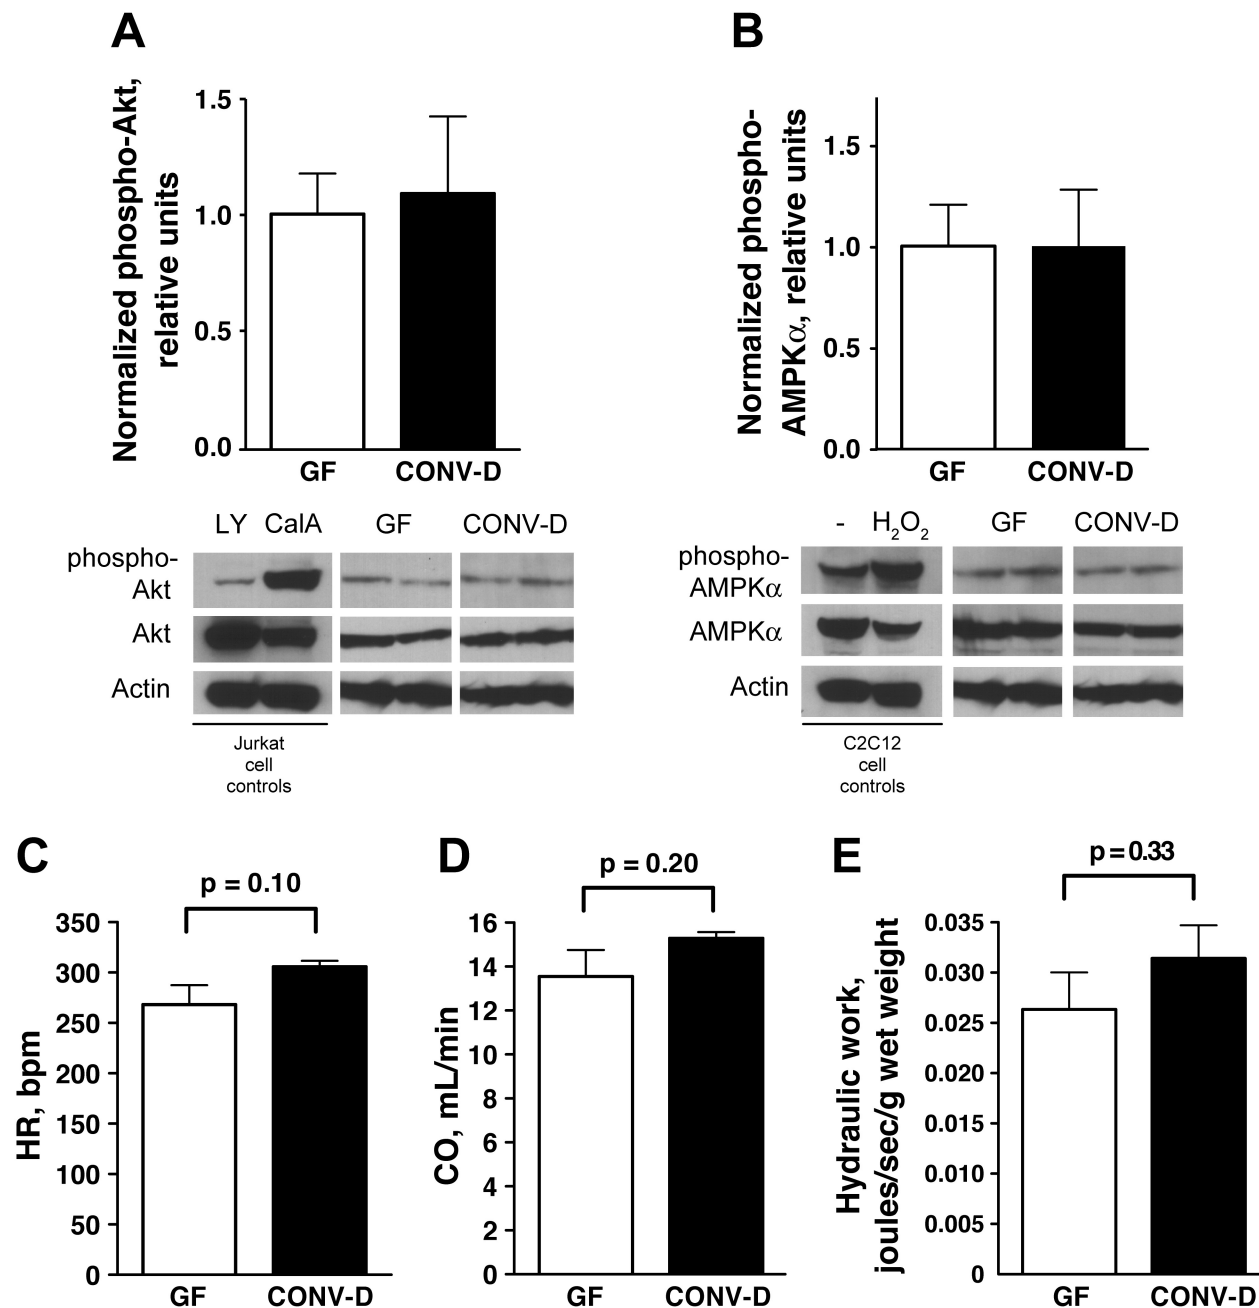

**Fig. S4.** Physiologic and biochemical analyses of hearts from fasted GF and CONV-D mice. (A and B) Studies of intact hearts. A shows the results of a Western blot analysis of the ratio of phospho-Akt1 (Ser-473) to Akt1 in the myocardium of fasted mice: No significant differences occur between fasted GF and CONV-D animals. Representative results from 2 mice are shown. Bar graphs plot mean values  $\pm$  SEM, as defined by gel densitometry ( $n = 10$  animals per group). Reference Akt controls consist of Jurkat cells stimulated with the PI3 kinase inhibitor LY294002 (abbreviated LY), or serum-starved Jurkat cells treated with the phosphatase inhibitor Calyculin A (abbreviated CalA). B presents an analysis of the Phospho-AMPK $\alpha$  (Thr-172) to AMPK ratio ( $n = 10$  animals per group; the same as in A). Positive controls consist of untreated C2C12 mouse myoblast cells (low phospho-AMPK $\alpha$ ) and cells treated for 5 min with 10 mM H $_2$ O $_2$  (high phospho-AMPK $\alpha$  control). Note that for the GF and CONV-D fasting heart lysates, a separate and identically loaded SDS/PAGE gel was prepared to perform a single control actin Western blot. Because the Akt and AMPK $\alpha$  signals presented in A and B were obtained from the same GF and CONV-D fasting myocardial lysates, the normalizing actin bands obtained from these 4 lysates are presented under both Akt (A) and AMPK $\alpha$  (B). (C–E) Studies of isolated working hearts. The results of measurements of heart rate (HR; C), cardiac output (CO; D), and cardiac hydraulic work (E) plotted of isolated working hearts. There were no statistically significant differences between any of the treatment groups (Student's  $t$  test).

**A**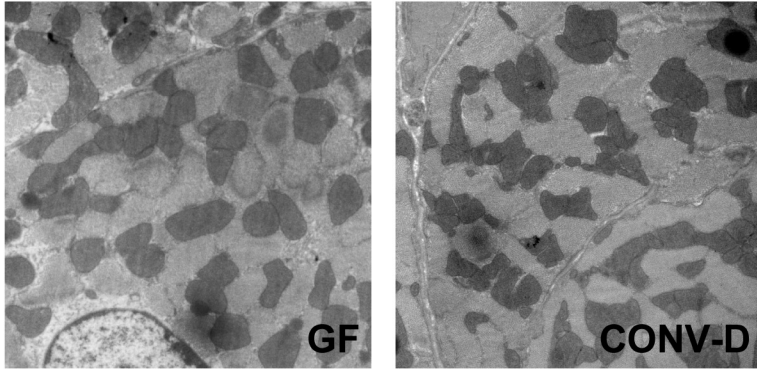**B**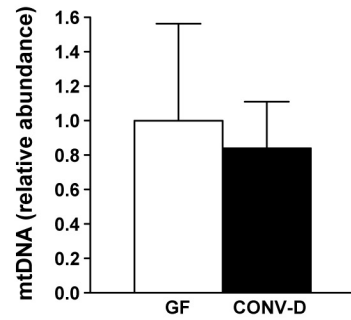**C**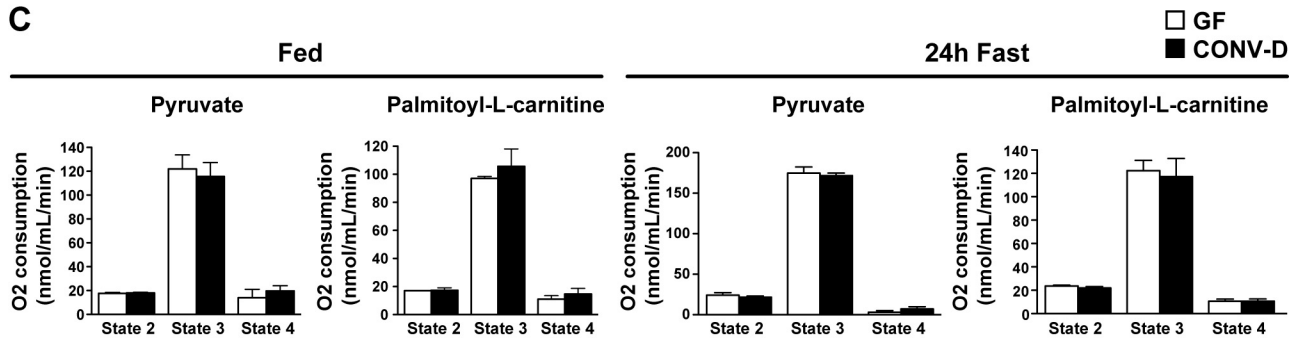

**Fig. 55.** Myocardial mitochondrial morphology, number, and function in GF and CONV-D mice. **(A)** Transmission EM micrographs of ventricles from CARB-fed GF and CONV-D mice showing similar mitochondrial morphology. **(B)** qPCR assays of the abundance of mitochondria in ventricles; abundance is defined as the ratio between mitochondrial and nuclear DNA using the *mtCytb* and *Rpl32* genes as PCR targets, respectively. **(C)** Measurements of oxygen consumption by isolated myocardial mitochondria using pyruvate and palmitoyl-L-carnitine as substrates under unstimulated (state 2), ADP-stimulated (state 3), and oligomycin-inhibited (state 4) conditions. There are no statistically significant differences between mitochondria isolated from the hearts of GF and CONV-D mice (2-way ANOVA).  $n = 5$  animals per group for *B* and *C*.



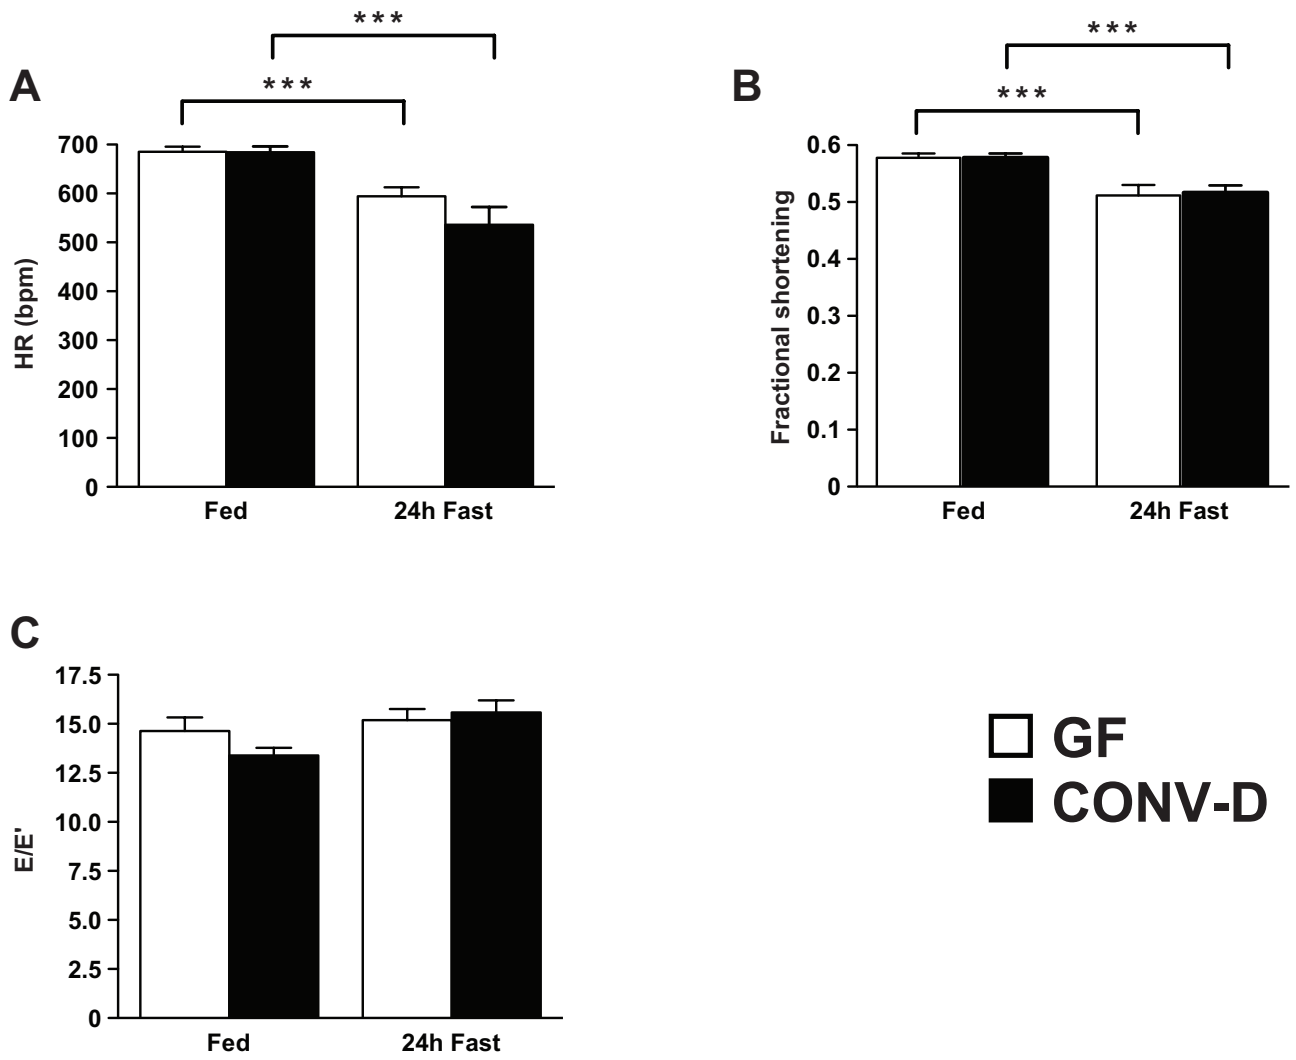

**Fig. S6.** Echocardiographic assessment of hearts from CARB-fed and fasted GF and CONV-D mice. In vivo echocardiographic determination of heart rate (A), fractional shortening (surrogate of systolic performance) (B), and E/E' assessment of diastolic function (C). \*\*,  $P < 0.01$ ; \*\*\*,  $P < 0.001$  (2-way ANOVA);  $n = 5$  animals per condition.

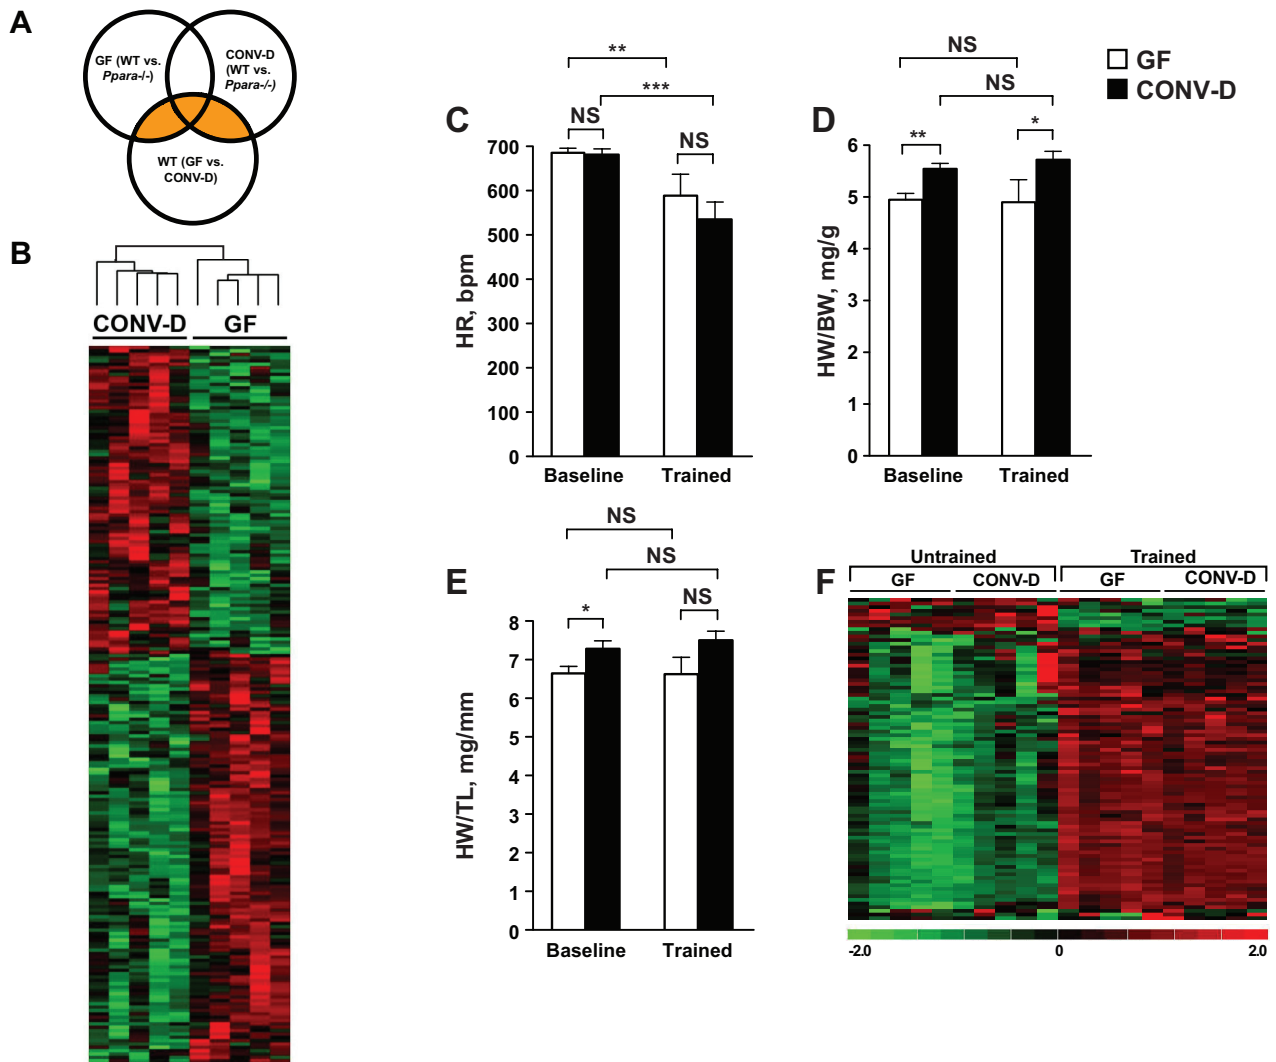

**Fig. S7.** Physiological and functional genomics analyses of the myocardial transcriptomes of CARB-fed untrained and trained GF and CONV-D mice. (A) A Venn diagram of the comparisons for untrained mice (see *S1 Text* for additional details). (B) Heatmap, generated in dChip, of 170 microbiota-responsive myocardial genes in untrained mice (culled from the areas of the Venn diagram that are amber-colored in A).  $n = 5$  animals per group. See [Table S5](#) for a list of these genes. (C–E) Effects of endurance training in CARB-fed GF and CONV-D mice. (C) Echocardiographic assessment of heart rate (HR) in untrained and trained GF and CONV-D mice. (D) Heart weight (HW) to body weight (BW) ratio. (E) Heart weight to tibial length (TL) ratio. (F) GeneChip-derived Heatmap showing the relative levels of expression of nuclear-encoded mitochondrial genes involved in electron transport and oxidative phosphorylation. See [Table S4](#) for a list of these genes.

□ GF  
 ■ CONV-D

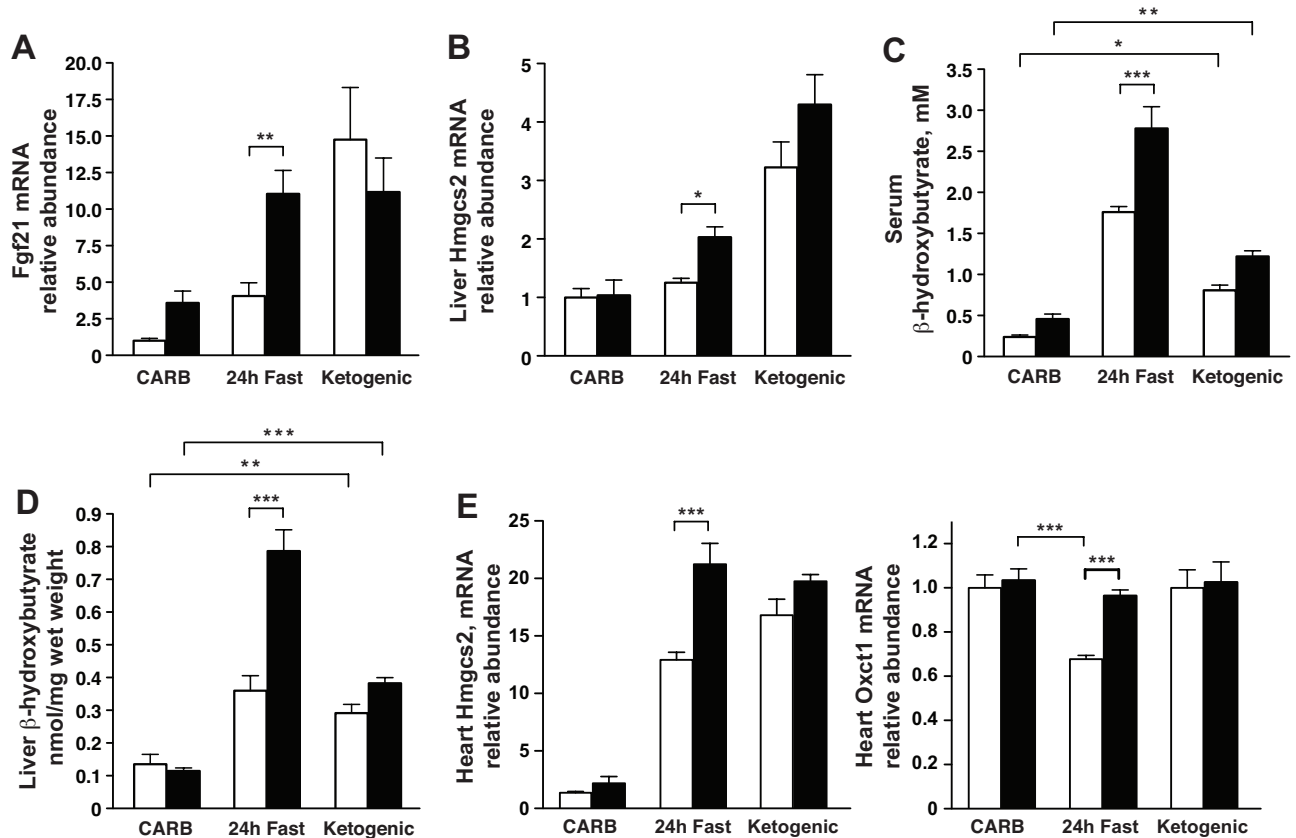

**Fig. 58.** Response of GF and CONV-D mice to a ketogenic diet. (A and B) qRT-PCR assays of *Fgf21* and *Hmgcs2* expression in the livers of GF and CONV-D animals fed a ketogenic diet for 30 days, compared with animals fed a standard CARB-diet, and those fasted for 24 h after being maintained on the CARB diet. Data are expressed relative to CARB-fed GF mice. \*,  $P < 0.05$ ; \*\*,  $P < 0.01$ ; NS, not significant (2-way ANOVA);  $n = 5$  animals per condition. (C and D) Serum (C) and hepatic (D) levels of  $\beta$ -hydroxybutyrate, \*\*\*,  $P < 0.01$ ;  $n = 6$  animals per condition. (E) Response within the myocardium of genes involved in ketone body metabolism to a ketogenic diet in GF and CONV-D mice: qRT-PCR assays of myocardial expression of *Hmgcs2* and *Oxct1*. \*\*\*,  $P < 0.001$  (2-way ANOVA);  $n = 5$  animals per condition.

**Table S1. IPA analysis of pathways significantly enriched in GeneChip datasets of genes differentially expressed in wild-type hearts of GF or CONV-D mice (CARB-fed vs. 24-h fast)**

| Regulated pathways                                | P value (Fisher's exact test) | Regulated genes                                                                                                                                               |
|---------------------------------------------------|-------------------------------|---------------------------------------------------------------------------------------------------------------------------------------------------------------|
| <b>GF</b>                                         |                               |                                                                                                                                                               |
| ERK/MAPK signaling                                | 0.001                         | PPARG, ETS1, MYCN, PPP1R14C, NRAS, PTK2B, SOS2, YWHAZ, PPP1CB, PPP1R3A, MKNK2, EIF4EBP1, PTK2, H3F3A, CREB1, DUSP4, YWHAQ (includes EG:22630), PPP2R5E, HSPB1 |
| NRF2-mediated oxidative stress response           | 0.002                         | GSTA3, UBB, MAP2K7, NRAS, SOD1, PRDX1, HERPUD1, MAFK, DNAJA1, HMOX1, SOD2, GSTA4, GCLM, SQSTM1, AOX1, FKBP5, GSTM1 (includes EG:14862), GSTK1                 |
| IGF-1 signaling                                   | 0.003                         | PTK2, NRAS, CTGF, YWHAZ, FOXO3, SOS2, CSNK2A1, IGF1R, YWHAZ, YWHAQ (includes EG:22630), RASA1                                                                 |
| PTEN signaling                                    | 0.003                         | PTK2, NRAS, FOXO3, SOS2, CDKN1A, CSNK2A1, CHUK, LOC643751, CCND1, MAGI-3, PDGFRB                                                                              |
| Hypoxia signaling in the cardiovascular system    | 0.005                         | VEGFA, UBB, NFKBIA, UBE2D2, CREB1, BIRC6, CSNK1D, UBE2D3, UBC                                                                                                 |
| 14-3-3-mediated signaling                         | 0.007                         | NRAS, YWHAZ, TUBB2A, YWHAZ, TUBA4A, VIM, PLCD1, PLCD3, PLCB4, TUBA1A, TUBA8, YWHAQ (includes EG:22630), PDGFRB                                                |
| PI3K/AKT signaling                                | 0.009                         | NRAS, NFKBIA, YWHAZ, FOXO3, SOS2, CDKN1A, YWHAZ, YWHAQ (includes EG:22630), CHUK, PPP2R5E, CCND1, EIF4EBP1                                                    |
| Cell cycle: G2/M DNA damage checkpoint regulation | 0.010                         | UBB, YWHAZ, CDKN1A, TOP2A, YWHAZ, UBC                                                                                                                         |
| Integrin signaling                                | 0.011                         | NRAS, SOS2, ITGA6, TSPAN2, PPP1CB, LOC643751, TTN, MYL7, ROCK1, PTK2, ARHGAP5, ACTR3, ARF4, RHOU, CAPN7, TSPAN4, ITGB5                                        |
| Glycine, serine, and threonine metabolism         | 0.013                         | PLCD1, PLCD3, PLCB4, SHMT1, ALAS1, PDPR, GCAT, SARS                                                                                                           |
| Calcium signaling                                 | 0.017                         | TPM1, CALR, HDAC2, TNNT2, TRDN, TPM4, MYH7, ATP2A2, MYL7, CAMK2D, CASQ1, CREB1, MYL4, ASPH, PPP3CA, CALM1                                                     |
| GM-CSF signaling                                  | 0.021                         | ETS1, CAMK2D, NRAS, CISH, SOS2, CCND1, PPP3CA                                                                                                                 |
| LPS/IL-1-mediated inhibition of RXR function      | 0.040                         | GSTA3, MAP2K7, FMO2, FMO5, HMGCS2, GSTA4, SULT1A1, NR5A2, ALAS1, ALDH18A1, SLC27A1, FABP5L2, FABP3, GSTM1 (includes EG:14862), GSTK1                          |
| Glutathione metabolism                            | 0.040                         | GSTA3, GPX3, OPLAH, GSTA4, GCLM, GSTM1 (includes EG:14862), GSTK1                                                                                             |
| Wnt/ $\beta$ -catenin signaling                   | 0.043                         | SOX4, UBB, GJA1, TCF4, CSNK1D, CCND1, CDH2, NLK, DKK3, CSNK2A1, PPP2R5E, UBC, WNT5A                                                                           |
| B cell receptor signaling                         | 0.043                         | ETS1, MAP2K7, CAMK2D, NRAS, NFKBIA, VAV3, SOS2, CREB1, CHUK, LOC643751, PPP3CA, CALM1                                                                         |
| VEGF signaling                                    | 0.044                         | PTK2, ROCK1, VEGFA, NRAS, PTK2B, YWHAZ, FOXO3, SOS2                                                                                                           |
| <b>CONV-D</b>                                     |                               |                                                                                                                                                               |
| NRF2-mediated oxidative stress response           | 0.0003                        | UBB, MAP2K7, SOD1, PRDX1, CREBBP, MAFK, DNAJA1, GSTO1, HMOX1, SOD2, GSTA4, DNAJC14, GCLM, AOX1, FKBP5, GSTM1 (includes EG:14862)                              |
| Cell Cycle: G2/M DNA damage checkpoint regulation | 0.002                         | UBB, YWHAZ, CDKN1A, TOP2A, YWHAZ, UBC                                                                                                                         |
| Wnt/ $\beta$ -catenin signaling                   | 0.003                         | SOX4, UBB, GJA1, TCF4, CREBBP, CSNK1D, CCND1, PPP2R1A, DKK3, CSNK2A1, PPP2R5E, UBC, WNT5A                                                                     |
| PI3K/AKT signaling                                | 0.006                         | PPP2R1A, NFKBIA, YWHAZ, FOXO3, SOS2, CDKN1A, YWHAZ, PPP2R5E, CCND1, EIF4EBP1                                                                                  |
| Synthesis and degradation of ketone bodies        | 0.007                         | OXCT1, HMGCS2, HMGCS1                                                                                                                                         |
| Glutathione metabolism                            | 0.007                         | GPX3, OPLAH, GSTA4, GCLM, GSTM1 (includes EG:14862), GSTO1, IDH1                                                                                              |
| Hypoxia signaling in the cardiovascular system    | 0.008                         | VEGFA, UBB, NFKBIA, UBE2D2, CSNK1D, UBC, UBE2E1                                                                                                               |
| PXR/RXR activation                                | 0.009                         | SCD, CYP3A4, FOXO3, ALAS1, HMGCS2, GSTM1 (includes EG:14862), PPARGC1A                                                                                        |
| Hepatic fibrosis/hepatic stellate cell activation | 0.010                         | VEGFA, CTGF, CYP2E1, IL10, IGF1R, MYL4, ECE1, MYH7, COL3A1, MYL7, PDGFRB                                                                                      |
| LPS/IL-1-mediated inhibition of RXR function      | 0.013                         | MAP2K7, FMO2, HMGCS2, FMO5, GSTO1, GSTA4, CYP3A4, SULT1A1, ALAS1, FABP4, SLC27A1, GSTM1 (includes EG:14862), HMGCS1                                           |
| Actin cytoskeleton signaling                      | 0.018                         | FGF16, F2R, SOS2, PFN2, RDX, PPP1CB, MYH7, LOC643751, TTN, MYL7, WASL (includes EG:8976), ACTR3, FGF12, MYL4                                                  |
| Xenobiotic metabolism signaling                   | 0.020                         | MAP2K7, FMO2, CREBBP, FMO5, GSTO1, CYP1B1, HMOX1, PPP2R1A, CAMK2D, GSTA4, CYP3A4, SULT1A1, PPP2R5E, GSTM1 (includes EG:14862), PPARGC1A                       |
| Regulation of actin-based motility by rho         | 0.021                         | ACTR3, WASL (includes EG:8976), RHOU, PFN2, PPP1CB, MYL4, LOC643751, MYL7                                                                                     |
| Protein ubiquitination pathway                    | 0.021                         | PSMB4, HSPA8, UBB, PSMC6, USP36, UBR2, UBE2D2, PSMC4, PSMD4, UBC, UBE2E1, HLA-C                                                                               |
| IGF-1 signaling                                   | 0.026                         | CTGF, YWHAZ, FOXO3, SOS2, CSNK2A1, IGF1R, YWHAZ                                                                                                               |

| Regulated pathways                           | <i>P</i> value (Fisher's exact test) | Regulated genes                                                                                  |
|----------------------------------------------|--------------------------------------|--------------------------------------------------------------------------------------------------|
| Ephrin receptor signaling                    | 0.028                                | VEGFA, GNAI3, ACTR3, WASL (includes EG:8976), ITSN1, ABI1, SORBS1, SOS2, ADAM10, LOC643751, GNG5 |
| p53 signaling                                | 0.030                                | RB1, GADD45B, GADD45G, CDKN1A, CSNK1D, HIPK2, CCND1                                              |
| PTEN signaling                               | 0.030                                | FOXO3, SOS2, CDKN1A, CSNK2A1, LOC643751, CCND1, PDGFRB                                           |
| Metabolism of xenobiotics by cytochrome P450 | 0.035                                | CYP3A4, GSTA4, CYP2E1, CYP4B1, ADH1C, MEST, GSTM1 (includes EG:14862), CYP1B1, GSTO1             |
| Butanoate metabolism                         | 0.044                                | LIPE, OXCT1, DCXR, HMGCS2, HMGCS1                                                                |
| Aryl hydrocarbon receptor signaling          | 0.044                                | RB1, NFIC, GSTA4, CDKN1A, NFIB, CCND1, GSTM1 (includes EG:14862), CYP1B1, GSTO                   |

**Table S2. IPA analysis of pathways significantly enriched in GeneChip datasets of genes differentially expressed in hearts of GF or CONV-D mice (wild-type vs. *Ppar $\alpha$*   $-/-$ )**

| Regulated pathways                           | P value (Fisher's Exact test) | Regulated genes                   |
|----------------------------------------------|-------------------------------|-----------------------------------|
| <b>GF</b>                                    |                               |                                   |
| Fatty acid metabolism                        | 0.0004                        | CPT2, ECH1, ACSL1                 |
| Butanoate metabolism                         | 0.002                         | BDH1, ECH1                        |
| Propanoate metabolism                        | 0.002                         | ECH1, ACSL1                       |
| Glycolysis/gluconeogenesis                   | 0.006                         | ACSL1, FBP2                       |
| Synthesis and degradation of ketone bodies   | 0.014                         | BDH1                              |
| Fatty acid elongation in mitochondria        | 0.020                         | ECH1                              |
| LPS/IL-1-mediated inhibition of RXR function | 0.022                         | CPT2, ACSL1                       |
| Pentose phosphate pathway                    | 0.045                         | FBP2                              |
| <b>CONV-D</b>                                |                               |                                   |
| Fatty acid metabolism                        | $2.51 \times 10^{-6}$         | CPT2, ECH1, ACAA2, ACSL1, ALDH9A1 |
| Butanoate metabolism                         | 0.0001                        | BDH1, ECH1, ALDH9A1               |
| Propanoate metabolism                        | 0.0002                        | ECH1, ACSL1, ALDH9A1              |
| Valine, leucine, and isoleucine degradation  | 0.0002                        | ECH1, ACAA2, ALDH9A1              |
| LPS/IL-1-mediated inhibition of RXR function | 0.0003                        | PPARA, CPT2, ACSL1, ALDH9A1       |
| Fatty acid elongation in mitochondria        | 0.0004                        | ECH1, ACAA2                       |
| Glycolysis/gluconeogenesis                   | 0.001                         | ACSL1, ALDH9A1, FBP2              |
| Bile acid biosynthesis                       | 0.002                         | ACAA2, ALDH9A1                    |
| $\beta$ -alanine metabolism                  | 0.004                         | ECH1, ALDH9A1                     |
| Lysine degradation                           | 0.006                         | ECH1, ALDH9A1                     |
| Pyruvate metabolism                          | 0.008                         | ACSL1, ALDH9A1                    |
| Synthesis and degradation of ketone bodies   | 0.021                         | BDH1                              |
| Tryptophan metabolism                        | 0.023                         | ECH1, ALDH9A1                     |
| Ascorbate and aldarate metabolism            | 0.034                         | ALDH9A1                           |
| Circadian rhythm signaling                   | 0.050                         | PER3                              |

**Table S3. IPA analysis of pathways significantly enriched in GeneChip datasets of genes differentially expressed in wild-type hearts of GF or CONV-D mice (untrained vs. trained)**

| Regulated pathways                                | P value (Fisher's Exact test) | Regulated genes                                                                                                                                          |
|---------------------------------------------------|-------------------------------|----------------------------------------------------------------------------------------------------------------------------------------------------------|
| <b>GF</b>                                         |                               |                                                                                                                                                          |
| Hepatic fibrosis/hepatic stellate cell activation | 9.77 × 10 <sup>-8</sup>       | IGFBP4, MYH6, FN1, IL10, VEGFC, MMP2, IGFBP5, MYH7, MYL7, COL1A2, COL1A1, IGF1, CSF1, TGFB2, PDGFRA, ACTG2 (includes EG:72), TIMP2, PDGFRB, COL3A1, EGFR |
| Cell cycle: G2/M DNA damage checkpoint regulation | 0.004                         | PCAF, YWHAE, YWHAB, TOP2A, YWHAZ, BRCA1                                                                                                                  |
| 14-3-3-mediated signaling                         | 0.005                         | TUBA8, YWHAE, YWHAB, PIK3R1, PDGFRA, YWHAZ, VIM, PDCD6IP, AXL, DDR1, EGFR, PDGFRB                                                                        |
| IGF-1 signaling                                   | 0.007                         | IGFBP4, IGF1, YWHAE, YWHAB, PIK3R1, FOXO3, YWHAZ, PRKAG2, IGFBP5                                                                                         |
| Wnt/β-catenin signaling                           | 0.011                         | SOX4, GJA1, SFRP2, FRZB, PPP2R1A, WIF1, CDH5, DKK3, TGFB2, FZD6, CD44, SFRP1, FZD2                                                                       |
| ERK/MAPK signaling                                | 0.023                         | ETS1, RAC2, MYCN, YWHAB, PIK3R1, CRKL, YWHAZ, PPP1CB, PPP1R3A, ELF4, PPP2R1A, PRKAG2, ELK3                                                               |
| Actin cytoskeleton signaling                      | 0.028                         | RAC2, MYH6, FN1, F2R, ARPC5L (includes EG:81873), PIK3R1, CRKL, PPP1CB, LIMK2, MYH7, PDGFC, MYL7, ACTR3, ACTG2 (includes EG:72)                          |
| Complement system                                 | 0.041                         | C1R, CD55, C1QB, CFH                                                                                                                                     |
| VEGF signaling                                    | 0.047                         | BCL2L1, YWHAE, PIK3R1, FOXO3, VEGFC, HIF1A, ACTG2 (includes EG:72)                                                                                       |
| <b>CONV-D</b>                                     |                               |                                                                                                                                                          |
| Hepatic fibrosis/hepatic stellate cell activation | 0.001                         | COL1A2, COL1A1, CSF1, IL10, VEGFC, IGFBP5, MMP2, COL3A1, PDGFRB                                                                                          |
| Synthesis and degradation of ketone bodies        | 0.001                         | BDH1, ACAA1, OXCT1                                                                                                                                       |
| Antigen presentation pathway                      | 0.005                         | HLA-DQA1, HLA-DRB1, CD74, HLA-C                                                                                                                          |
| Cardiac β-adrenergic signaling                    | 0.008                         | PPP2R1A, AKAP2, PDE7A, ADRBK2, PRKAG2, PPP1CB, ADCY7                                                                                                     |
| Leukocyte extravasation signaling                 | 0.010                         | ARHGAP5, GNAI3, TIMP3, TIMP4, CLDN5, PIK3R1, CYBB, MMP2, CTNND1                                                                                          |
| ERK/MAPK signaling                                | 0.021                         | ETS1, PPP2R1A, PIK3R1, YWHAZ, PRKAG2, PPP1CB, ETS2, ELK3                                                                                                 |
| IGF-1 signaling                                   | 0.025                         | PIK3R1, FOXO3, YWHAZ, PRKAG2, IGFBP5                                                                                                                     |
| Cell cycle: G2/M DNA damage checkpoint regulation | 0.039                         | WEE1, TOP2A, YWHAZ                                                                                                                                       |
| PXR/RXR activation                                | 0.044                         | CYP3A4, FOXO3, PRKAG2, CES1 (includes EG:1066)                                                                                                           |
| Bile acid biosynthesis                            | 0.045                         | CYP3A4, ACAA1, ADH1C                                                                                                                                     |

Table S4. Genes included in the HeatMap shown in Fig. S7F

| Gene                                                                  | Accession no. | GF                                            |                  | CONV-D                                        |                  | CARB-fed untrained                       |                  | CARB-fed trained                       |                  |
|-----------------------------------------------------------------------|---------------|-----------------------------------------------|------------------|-----------------------------------------------|------------------|------------------------------------------|------------------|----------------------------------------|------------------|
|                                                                       |               | Fold change in CARB-fed trained vs. untrained | P value (t test) | Fold change in CARB-fed trained vs. untrained | P value (t test) | Fold change in CARB-fed untrained vs. GF | P value (t test) | Fold change in CARB-fed trained vs. GF | P value (t test) |
| NADH dehydrogenase (ubiquinone) 1 alpha subcomplex 10                 | NM_024197     | 1.52                                          | <0.001           | 1.55                                          | <0.001           | 1.03                                     | 0.727            | 1.05                                   | 0.360            |
| NADH dehydrogenase (ubiquinone) 1 alpha subcomplex 11                 | AA596846      | 1.45                                          | 0.002            | 1.35                                          | 0.002            | 1.11                                     | 0.202            | 1.04                                   | 0.552            |
| NADH dehydrogenase (ubiquinone) 1 alpha subcomplex, 1                 | NM_019443     | 1.19                                          | 0.042            | 1.13                                          | 0.118            | 1.03                                     | 0.756            | -1.02                                  | 0.398            |
| NADH dehydrogenase (ubiquinone) 1 alpha subcomplex, 12                | NM_025551     | 1.43                                          | 0.013            | 1.38                                          | <0.001           | 1.06                                     | 0.615            | 1.02                                   | 0.511            |
| NADH dehydrogenase (ubiquinone) 1 alpha subcomplex, 13                | A1429575      | 1.6                                           | <0.001           | 1.3                                           | <0.001           | 1.09                                     | 0.330            | -1.13                                  | 0.015            |
| NADH dehydrogenase (ubiquinone) 1 alpha subcomplex, 2                 | NM_010885     | 1.35                                          | 0.001            | 1.12                                          | 0.062            | 1.16                                     | 0.074            | -1.04                                  | 0.161            |
| NADH dehydrogenase (ubiquinone) 1 alpha subcomplex, 3                 | AV048277      | 1.45                                          | 0.001            | 1.24                                          | 0.005            | 1.15                                     | 0.085            | -1.01                                  | 0.546            |
| NADH dehydrogenase (ubiquinone) 1 alpha subcomplex, 4                 | BC011114      | 1.59                                          | <0.001           | 1.59                                          | <0.001           | -1.03                                    | 0.686            | -1.03                                  | 0.143            |
| NADH dehydrogenase (ubiquinone) 1 alpha subcomplex, 5                 | NM_026614     | 2.4                                           | <0.001           | 1.94                                          | <0.001           | 1.12                                     | 0.214            | -1.11                                  | 0.066            |
| NADH dehydrogenase (ubiquinone) 1 alpha subcomplex, 6 (B14)           | NM_025987     | 1.99                                          | <0.001           | 1.76                                          | <0.001           | 1.01                                     | 0.925            | -1.12                                  | 0.038            |
| NADH dehydrogenase (ubiquinone) 1 alpha subcomplex, 7 (B14.5a)        | NM_023202     | 1.54                                          | <0.001           | 1.45                                          | 0.002            | 1.07                                     | 0.432            | 1.01                                   | 0.714            |
| NADH dehydrogenase (ubiquinone) 1 alpha subcomplex, 8                 | BC012416      | 1.78                                          | <0.001           | 1.47                                          | <0.001           | 1.2                                      | 0.042            | -1.01                                  | 0.805            |
| NADH dehydrogenase (ubiquinone) 1 alpha subcomplex, 9                 | NM_025358     | 1.2                                           | 0.015            | 1.13                                          | 0.048            | 1.07                                     | 0.359            | 1                                      | 0.934            |
| NADH dehydrogenase (ubiquinone) 1 alpha subcomplex, assembly factor 1 | BC018422      | 1.09                                          | 0.192            | 1.13                                          | 0.036            | -1.01                                    | 0.884            | 1.03                                   | 0.551            |
| NADH dehydrogenase (ubiquinone) 1 beta subcomplex 3                   | NM_025597     | 1.45                                          | <0.001           | 1.44                                          | <0.001           | 1.04                                     | 0.529            | 1.03                                   | 0.462            |
| NADH dehydrogenase (ubiquinone) 1 beta subcomplex 4                   | BG968046      | 1.59                                          | <0.001           | 1.38                                          | <0.001           | 1.14                                     | 0.074            | -1.02                                  | 0.361            |
| NADH dehydrogenase (ubiquinone) 1 beta subcomplex 8                   | NM_026061     | 1.48                                          | 0.004            | 1.31                                          | 0.009            | 1.09                                     | 0.473            | -1.04                                  | 0.167            |
| NADH dehydrogenase (ubiquinone) 1 beta subcomplex, 10                 | BI905689      | 1.3                                           | 0.003            | 1.15                                          | 0.010            | 1.12                                     | 0.109            | -1.01                                  | 0.777            |
| NADH dehydrogenase (ubiquinone) 1 beta subcomplex, 11                 | BC027265      | 1.37                                          | 0.007            | 1.16                                          | 0.027            | 1.09                                     | 0.369            | -1.08                                  | 0.007            |
| NADH dehydrogenase (ubiquinone) 1 beta subcomplex, 2                  | NM_026612     | 1.76                                          | <0.001           | 1.67                                          | <0.001           | 1.01                                     | 0.899            | -1.04                                  | 0.155            |
| NADH dehydrogenase (ubiquinone) 1 beta subcomplex, 5                  | BC025155      | 1.19                                          | 0.010            | 1.12                                          | 0.013            | 1.07                                     | 0.199            | 1.02                                   | 0.567            |
| NADH dehydrogenase (ubiquinone) 1 beta subcomplex, 7                  | NM_025843     | 1.85                                          | 0.001            | 1.7                                           | <0.001           | 1.02                                     | 0.857            | -1.07                                  | 0.125            |
| NADH dehydrogenase (ubiquinone) 1 beta subcomplex, 9                  | AV161987      | 1.57                                          | <0.001           | 1.4                                           | <0.001           | 1.09                                     | 0.337            | -1.03                                  | 0.280            |
| NADH dehydrogenase (ubiquinone) 1, alpha/beta subcomplex, 1           | AK010307      | 1.56                                          | <0.001           | 1.43                                          | <0.001           | 1.07                                     | 0.277            | -1.01                                  | 0.572            |
| NADH dehydrogenase (ubiquinone) 1, subcomplex unknown, 1              | NM_025523     | 1.5                                           | 0.001            | 1.41                                          | <0.001           | 1.05                                     | 0.542            | -1.02                                  | 0.432            |
| NADH dehydrogenase (ubiquinone) 1, subcomplex unknown, 2              | NM_024220     | 1.08                                          | 0.218            | 1.11                                          | 0.095            | 1.06                                     | 0.364            | 1.09                                   | 0.128            |
| NADH dehydrogenase (ubiquinone) Fe-S protein 1                        | BC006660      | 1.58                                          | <0.001           | 1.4                                           | <0.001           | 1.05                                     | 0.229            | -1.07                                  | 0.001            |
| NADH dehydrogenase (ubiquinone) Fe-S protein 2                        | BC016097      | 1.56                                          | <0.001           | 1.34                                          | <0.001           | 1.07                                     | 0.235            | -1.08                                  | 0.015            |
| NADH dehydrogenase (ubiquinone) Fe-S protein 3                        | BC027270      | 1.4                                           | 0.001            | 1.2                                           | 0.003            | 1.11                                     | 0.125            | -1.05                                  | 0.054            |
| NADH dehydrogenase (ubiquinone) Fe-S protein 4                        | NM_010887     | 1.5                                           | <0.001           | 1.38                                          | 0.001            | 1.07                                     | 0.298            | -1.01                                  | 0.831            |
| NADH dehydrogenase (ubiquinone) Fe-S protein 5                        | NM_134104     | 1.41                                          | 0.001            | 1.31                                          | <0.001           | 1.1                                      | 0.166            | 1.02                                   | 0.620            |
| NADH dehydrogenase (ubiquinone) Fe-S protein 6                        | C88200        | 1.7                                           | <0.001           | 1.35                                          | <0.001           | 1.18                                     | 0.038            | -1.06                                  | 0.124            |



| Gene                                                                  | Accession no. | GF                                            |                                 | CONV-D                                        |                                 | CARB-fed untrained                       |                                 | CARB-fed trained                       |                                 |
|-----------------------------------------------------------------------|---------------|-----------------------------------------------|---------------------------------|-----------------------------------------------|---------------------------------|------------------------------------------|---------------------------------|----------------------------------------|---------------------------------|
|                                                                       |               | Fold change in CARB-fed trained vs. untrained | <i>P</i> value ( <i>t</i> test) | Fold change in CARB-fed trained vs. untrained | <i>P</i> value ( <i>t</i> test) | Fold change in CARB-fed untrained vs. GF | <i>P</i> value ( <i>t</i> test) | Fold change in CARB-fed trained vs. GF | <i>P</i> value ( <i>t</i> test) |
| NADH dehydrogenase (ubiquinone) Fe-S protein 7                        | BC013503      | 2.16                                          | <0.001                          | 1.89                                          | <0.001                          | 1.11                                     | 0.227                           | -1.03                                  | 0.561                           |
| NADH dehydrogenase (ubiquinone) Fe-S protein 8                        | BC021616      | 1.39                                          | 0.001                           | 1.29                                          | 0.011                           | 1.1                                      | 0.309                           | 1.03                                   | 0.557                           |
| NADH dehydrogenase (ubiquinone) flavoprotein 1                        | NM_133666     | 1.72                                          | <0.001                          | 1.53                                          | 0.001                           | 1.05                                     | 0.639                           | -1.07                                  | 0.085                           |
| NADH dehydrogenase (ubiquinone) flavoprotein 2                        | BI692577      | 1.54                                          | <0.001                          | 1.32                                          | 0.001                           | 1.12                                     | 0.162                           | -1.04                                  | 0.130                           |
| succinate dehydrogenase complex, subunit A, flavoprotein (Fp)         | BF585357      | 1.11                                          | 0.037                           | 1.06                                          | 0.106                           | 1.05                                     | 0.242                           | 1.01                                   | 0.638                           |
| succinate dehydrogenase complex, subunit B, iron sulfur (Ip)          | BC013509      | 1.34                                          | 0.002                           | 1.21                                          | 0.011                           | 1.1                                      | 0.216                           | -1                                     | 0.840                           |
| succinate dehydrogenase complex, subunit C, integral membrane protein | AW107712      | 1.01                                          | 0.940                           | 1.13                                          | 0.177                           | -1.05                                    | 0.488                           | 1.07                                   | 0.621                           |
| succinate dehydrogenase complex, subunit D, integral membrane protein | AK013962      | 1.32                                          | <0.001                          | 1.26                                          | <0.001                          | 1.07                                     | 0.158                           | 1.03                                   | 0.460                           |
| cytochrome b, ascorbate dependent 3                                   | BB218627      | -1.09                                         | 0.543                           | -1.19                                         | 0.109                           | 1.02                                     | 0.878                           | -1.08                                  | 0.593                           |
| cytochrome b-245, alpha polypeptide                                   | AK018713      | -1.16                                         | 0.153                           | -1.34                                         | 0.006                           | 1                                        | 0.969                           | -1.15                                  | 0.151                           |
| cytochrome b-245, beta polypeptide                                    | AV373944      | -2.16                                         | <0.001                          | -2.25                                         | <0.001                          | -1.04                                    | 0.573                           | -1.09                                  | 0.358                           |
| cytochrome b-5                                                        | NM_025797     | 1.02                                          | 0.693                           | 1.02                                          | 0.570                           | 1.04                                     | 0.375                           | 1.04                                   | 0.197                           |
| cytochrome b-561                                                      | BC006732      | 1.04                                          | 0.783                           | 1.41                                          | 0.096                           | -1.16                                    | 0.203                           | 1.17                                   | 0.435                           |
| cytochrome c oxidase subunit IV isoform 1                             | NM_009941     | 1.25                                          | 0.022                           | 1.08                                          | 0.397                           | 1.16                                     | 0.217                           | -1                                     | 0.907                           |
| cytochrome c oxidase subunit IV isoform 2                             | NM_053091     | -1.43                                         | 0.046                           | -1.67                                         | 0.012                           | -1.01                                    | 0.922                           | -1.18                                  | 0.316                           |
| cytochrome c oxidase subunit VIIa polypeptide 2-like                  | NM_009187     | 1.37                                          | <0.001                          | 1.21                                          | 0.006                           | 1.01                                     | 0.762                           | -1.12                                  | 0.024                           |
| cytochrome c oxidase, subunit Va                                      | NM_007747     | 1.14                                          | 0.056                           | -1.02                                         | 0.833                           | 1.12                                     | 0.228                           | -1.04                                  | 0.421                           |
| cytochrome c oxidase, subunit Vb                                      | NM_009942     | 1.31                                          | 0.013                           | 1.21                                          | 0.017                           | 1.05                                     | 0.625                           | -1.03                                  | 0.119                           |
| cytochrome c oxidase, subunit VI a, polypeptide 1                     | NM_007748     | 1.35                                          | 0.009                           | 1.47                                          | 0.006                           | -1.21                                    | 0.163                           | -1.11                                  | 0.161                           |
| cytochrome c oxidase, subunit VI a, polypeptide 2                     | NM_009943     | 1.23                                          | 0.027                           | 1.07                                          | 0.492                           | 1.13                                     | 0.324                           | -1.02                                  | 0.396                           |
| cytochrome c oxidase, subunit VIb polypeptide 1                       | NM_025628     | 1.23                                          | 0.007                           | 1.08                                          | 0.157                           | 1.05                                     | 0.528                           | -1.09                                  | 0.038                           |
| cytochrome c oxidase, subunit VIc                                     | NM_053071     | 1.25                                          | 0.028                           | 1.07                                          | 0.555                           | 1.16                                     | 0.302                           | -1.01                                  | 0.797                           |
| cytochrome c oxidase, subunit VIIa 1                                  | AF037370      | 1.51                                          | 0.001                           | 1.27                                          | 0.006                           | 1.23                                     | 0.067                           | 1.04                                   | 0.339                           |
| cytochrome c oxidase, subunit VIIa 2                                  | NM_009945     | 1.27                                          | 0.005                           | 1.12                                          | 0.173                           | 1.09                                     | 0.382                           | -1.04                                  | 0.277                           |
| cytochrome c oxidase, subunit VIIc                                    | NM_007749     | 1.14                                          | 0.133                           | 1.04                                          | 0.520                           | 1.08                                     | 0.456                           | -1.02                                  | 0.455                           |
| cytochrome c oxidase, subunit VIIa                                    | NM_007750     | 1.54                                          | <0.001                          | 1.62                                          | <0.001                          | -1.09                                    | 0.291                           | -1.04                                  | 0.205                           |
| cytochrome c oxidase, subunit VIIb                                    | NM_007751     | 1.56                                          | 0.002                           | 1.31                                          | 0.006                           | 1.16                                     | 0.186                           | -1.02                                  | 0.372                           |
| cytochrome c oxidase, subunit VIIc                                    | AA144594      | -2.05                                         | <0.001                          | -1.73                                         | <0.001                          | 1.11                                     | 0.117                           | 1.31                                   | 0.044                           |
| cytochrome c, somatic                                                 | NM_007808     | 1.39                                          | 0.001                           | 1.4                                           | <0.001                          | 1.04                                     | 0.625                           | 1.05                                   | 0.066                           |
| cytochrome c-1                                                        | NM_025567     | 1.16                                          | 0.023                           | 1.03                                          | 0.747                           | 1.1                                      | 0.339                           | -1.04                                  | 0.294                           |
| NADPH cytochrome B5 oxidoreductase                                    | BC025438      | 1.03                                          | 0.553                           | 1                                             | 0.997                           | 1.01                                     | 0.896                           | -1.02                                  | 0.610                           |
| ubiquinol cytochrome c reductase core protein 2                       | BG075002      | 1.31                                          | 0.004                           | 1.19                                          | 0.004                           | 1.06                                     | 0.465                           | -1.04                                  | 0.212                           |
| ubiquinol-cytochrome c reductase (6.4kD) subunit                      | NM_025650     | 1.5                                           | 0.002                           | 1.47                                          | <0.001                          | -1                                       | 0.990                           | -1.02                                  | 0.339                           |
| ubiquinol-cytochrome c reductase binding protein                      | NM_026219     | -1.28                                         | 0.001                           | -1.3                                          | <0.001                          | 1.08                                     | 0.068                           | 1.07                                   | 0.123                           |
| ubiquinol-cytochrome c reductase core protein 1                       | AK004031      | 1.37                                          | 0.004                           | 1.05                                          | 0.473                           | 1.21                                     | 0.083                           | -1.08                                  | 0.162                           |
| ubiquinol-cytochrome c reductase hinge protein                        | AW106975      | 1.33                                          | 0.003                           | 1.25                                          | 0.006                           | 1.05                                     | 0.528                           | -1.01                                  | 0.541                           |
| ubiquinol-cytochrome c reductase, Rieske iron-sulfur polypeptide 1    | AK003966      | 1.31                                          | 0.003                           | 1.22                                          | 0.007                           | 1.05                                     | 0.484                           | -1.02                                  | 0.400                           |
| ATP synthase mitochondrial F1 complex assembly factor 1               | BB771055      | 1.79                                          | <0.001                          | 1.59                                          | <0.001                          | 1.18                                     | 0.001                           | 1.05                                   | 0.242                           |
| ATP synthase mitochondrial F1 complex assembly factor 2               | AI851949      | 1.67                                          | <0.001                          | 1.79                                          | 0.003                           | 1.11                                     | 0.375                           | 1.19                                   | 0.126                           |

| Gene                                                                                                                                                   | Accession no. | GF                                            |                         | CONV-D                                        |                         | CARB-fed untrained                       |                         | CARB-fed trained                       |                         |
|--------------------------------------------------------------------------------------------------------------------------------------------------------|---------------|-----------------------------------------------|-------------------------|-----------------------------------------------|-------------------------|------------------------------------------|-------------------------|----------------------------------------|-------------------------|
|                                                                                                                                                        |               | Fold change in CARB-fed trained vs. untrained | <i>P</i> value (t test) | Fold change in CARB-fed trained vs. untrained | <i>P</i> value (t test) | Fold change in CARB-fed untrained vs. GF | <i>P</i> value (t test) | Fold change in CARB-fed trained vs. GF | <i>P</i> value (t test) |
| ATP synthase, H + transporting mitochondrial F1 complex, beta subunit                                                                                  | NM_016774     | -1.09                                         | 0.301                   | -1.25                                         | 0.137                   | 1.14                                     | 0.335                   | -1                                     | 0.932                   |
| ATP synthase, H + transporting, mitochondrial F0 complex, subunit b, isoform 1                                                                         | AK019459      | 1.41                                          | <0.001                  | 1.34                                          | <0.001                  | 1.06                                     | 0.323                   | 1.01                                   | 0.795                   |
| ATP synthase, H + transporting, mitochondrial F0 complex, subunit c (subunit 9), isoform 1                                                             | NM_007506     | 1.41                                          | 0.002                   | 1.29                                          | 0.002                   | 1.1                                      | 0.264                   | -1                                     | 0.982                   |
| ATP synthase, H + transporting, mitochondrial F0 complex, subunit c (subunit 9), isoform 2                                                             | NM_026468     | 1.6                                           | <0.001                  | 1.46                                          | <0.001                  | 1.08                                     | 0.222                   | -1.01                                  | 0.313                   |
| ATP synthase, H + transporting, mitochondrial F0 complex, subunit c (subunit 9), isoform 3                                                             | AU080319      | 1.14                                          | 0.123                   | 1.01                                          | 0.967                   | 1.14                                     | 0.384                   | 1.01                                   | 0.770                   |
| ATP synthase, H + transporting, mitochondrial F0 complex, subunit d                                                                                    | AF354051      | 1.21                                          | 0.021                   | 1.04                                          | 0.680                   | 1.13                                     | 0.287                   | -1.03                                  | 0.117                   |
| ATP synthase, H + transporting, mitochondrial F0 complex, subunit d                                                                                    | AV154755      | -1.05                                         | 0.472                   | -1.13                                         | 0.275                   | 1.14                                     | 0.274                   | 1.06                                   | 0.173                   |
| ATP synthase, H + transporting, mitochondrial F0 complex, subunit F                                                                                    | NM_016755     | 1.37                                          | 0.001                   | 1.2                                           | 0.011                   | 1.08                                     | 0.339                   | -1.06                                  | 0.047                   |
| ATP synthase, H + transporting, mitochondrial F0 complex, subunit f, isoform 2                                                                         | NM_020582     | 1.58                                          | <0.001                  | 1.49                                          | <0.001                  | 1.08                                     | 0.374                   | 1.02                                   | 0.604                   |
| ATP synthase, H + transporting, mitochondrial F0 complex, subunit f, isoform 2                                                                         | BG794445      | 1.08                                          | 0.181                   | 1.03                                          | 0.676                   | 1.08                                     | 0.338                   | 1.03                                   | 0.248                   |
| ATP synthase, H + transporting, mitochondrial F0 complex, subunit g                                                                                    | NM_013795     | 1.31                                          | 0.010                   | 1.29                                          | 0.003                   | 1.03                                     | 0.678                   | 1.02                                   | 0.765                   |
| ATP synthase, H + transporting, mitochondrial F0 complex, subunit s                                                                                    | NM_026536     | 1.49                                          | <0.001                  | 1.51                                          | 0.009                   | -1.01                                    | 0.913                   | -1                                     | 0.982                   |
| ATP synthase, H + transporting, mitochondrial F1 complex, alpha subunit, isoform 1                                                                     | C78762        | 1.43                                          | 0.023                   | -1.01                                         | 0.956                   | 1.17                                     | 0.412                   | -1.23                                  | 0.098                   |
| ATP synthase, H + transporting, mitochondrial F1 complex, delta subunit                                                                                | BC008273      | 1.48                                          | <0.001                  | 1.27                                          | 0.001                   | 1.07                                     | 0.251                   | -1.1                                   | 0.033                   |
| ATP synthase, H + transporting, mitochondrial F1 complex, epsilon subunit                                                                              | NM_025983     | 1.8                                           | <0.001                  | 1.83                                          | <0.001                  | -1.04                                    | 0.744                   | -1.02                                  | 0.426                   |
| ATP synthase, H + transporting, mitochondrial F1 complex, gamma polypeptide 1                                                                          | NM_020615     | 1.43                                          | 0.001                   | 1.26                                          | 0.012                   | 1.14                                     | 0.173                   | 1                                      | 0.897                   |
| ATP synthase, H + transporting, mitochondrial F1 complex, O subunit                                                                                    | NM_138597     | 1.34                                          | 0.007                   | 1.21                                          | 0.024                   | 1.08                                     | 0.402                   | -1.02                                  | 0.170                   |
| ATP synthase, H + transporting, mitochondrial F1 complex, O subunit /// similar to ATP synthase, H + transporting, mitochondrial F1 complex, O subunit | AV066932      | -1.8                                          | 0.037                   | -1.65                                         | 0.009                   | -1.02                                    | 0.902                   | 1.07                                   | 0.504                   |
| ATP synthase, H + transporting, mitochondrial F1F0 complex, subunit e                                                                                  | NM_007507     | 1.45                                          | 0.003                   | 1.26                                          | <0.001                  | 1.12                                     | 0.222                   | -1.02                                  | 0.452                   |

Table S5. Genes included in the HeatMap shown in Fig. S7B

| Gene                                                                                                                                 | Accession Number | Fold change in CARB-fed CONV-D vs. GF | P value (Student's t test) |
|--------------------------------------------------------------------------------------------------------------------------------------|------------------|---------------------------------------|----------------------------|
| Histocompatibility 2, class II antigen A, alpha                                                                                      | AV018723         | 2.84                                  | 0.02                       |
| Thioredoxin interacting protein                                                                                                      | AF173681         | 2.31                                  | 0.05                       |
| Uncoupling protein 3 (mitochondrial, proton carrier)                                                                                 | AF053352         | 2.26                                  | 0.02                       |
| Ia-associated invariant chain                                                                                                        | BC003476         | 2.04                                  | 0.01                       |
| D site albumin promoter binding protein                                                                                              | BC018323         | 1.83                                  | 0.01                       |
| Histocompatibility 2, class II antigen E beta                                                                                        | NM_010382        | 1.81                                  | 0.03                       |
| Tropomodulin 4                                                                                                                       | NM_016712        | 1.81                                  | 0.005                      |
| Prostaglandin D2 synthase (brain)                                                                                                    | AB006361         | 1.71                                  | 0.03                       |
| Carboxypeptidase X 2 (M14 family)                                                                                                    | AF017639         | 1.65                                  | 0.02                       |
| Pyruvate dehydrogenase kinase, isoenzyme 4                                                                                           | NM_013743        | 1.63                                  | 0.05                       |
| Angiotensin-like 4                                                                                                                   | NM_020581        | 1.61                                  | 0.02                       |
| Glutamic pyruvate transaminase (alanine aminotransferase) 2                                                                          | BI648645         | 1.59                                  | 0.02                       |
| Sterol carrier protein 2, liver                                                                                                      | C76618           | 1.56                                  | 0.04                       |
| Sodium channel, type IV, beta                                                                                                        | BE993937         | 1.56                                  | 0.0002                     |
| p21 (CDKN1A)-activated kinase 6                                                                                                      | BB818370         | 1.55                                  | 0.001                      |
| Guanine nucleotide binding protein, beta 3                                                                                           | NM_013530        | 1.49                                  | 0.04                       |
| Zinc finger protein 306                                                                                                              | BC007473         | 1.47                                  | 0.02                       |
| PRP19/PSO4 homolog ( <i>Saccharomyces cerevisiae</i> )                                                                               | BC004070         | 1.47                                  | 0.05                       |
| SH2 domain containing 4A                                                                                                             | AK008803         | 1.45                                  | 0.004                      |
| InaD-like ( <i>Drosophila</i> )                                                                                                      | AV287690         | 1.42                                  | 0.004                      |
| RNA polymerase 1-2                                                                                                                   | NM_009086        | 1.4                                   | 0.01                       |
| F-box and leucine-rich repeat protein 17                                                                                             | AK018254         | 1.4                                   | 0.04                       |
| Nuclear receptor subfamily 1, group D, member 1                                                                                      | W13191           | 1.39                                  | 0.002                      |
| Myosin Vb                                                                                                                            | AW546331         | 1.37                                  | 0.002                      |
| Solute carrier family 16 (monocarboxylic acid transporters), member 10                                                               | BB735478         | 1.36                                  | 0.05                       |
| Stomatin                                                                                                                             | AF093620         | 1.35                                  | 0.05                       |
| SH3-domain binding protein 5 (BTK-associated)                                                                                        | BQ179335         | 1.35                                  | 0.03                       |
| Microtubule-associated protein tau                                                                                                   | M18775           | 1.35                                  | 0.004                      |
| Ankyrin 3, epithelial /// RIKEN cDNA 2900054D09 gene                                                                                 | BB628935         | 1.35                                  | 0.001                      |
| FYVE and coiled-coil domain containing 1                                                                                             | BM123442         | 1.35                                  | 0.03                       |
| Coenzyme Q3 homolog, methyltransferase (yeast)                                                                                       | BB108855         | 1.33                                  | 0.0017                     |
| Protein kinase inhibitor, alpha                                                                                                      | AK010212         | 1.32                                  | 0.01                       |
| Enoyl coenzyme A hydratase 1, peroxisomal                                                                                            | NM_016772        | 1.32                                  | 0.01                       |
| CD2 antigen (cytoplasmic tail) binding protein 2                                                                                     | NM_027353        | 1.31                                  | 0.04                       |
| Cell cycle progression 1                                                                                                             | BC006717         | 1.31                                  | 0.05                       |
| RNA binding motif and ELMO domain 1                                                                                                  | BC016193         | 1.31                                  | 0.03                       |
| Arylacetamide deacetylase-like 1                                                                                                     | AV369935         | 1.31                                  | 0.01                       |
| Sorting nexin 5                                                                                                                      | NM_024225        | 1.3                                   | 0.0003                     |
| Ankyrin repeat domain 1 (cardiac muscle)                                                                                             | AK009959         | 1.29                                  | 0.005                      |
| Mitogen-activated protein kinase kinase kinase 4                                                                                     | AV079128         | 1.29                                  | 0.05                       |
| Fibroblast growth factor 16                                                                                                          | NM_030614        | 1.28                                  | 0.03                       |
| Synaptojanin 2                                                                                                                       | BE944213         | 1.28                                  | 0.05                       |
| Ectonucleoside triphosphate diphosphohydrolase 5                                                                                     | BB309883         | 1.28                                  | 9.E-06                     |
| Fumarylacetoacetate hydrolase                                                                                                        | NM_010176        | 1.27                                  | 0.02                       |
| Diacylglycerol O-acyltransferase 2                                                                                                   | AK002443         | 1.27                                  | 0.01                       |
| Influenza virus NS1A binding protein                                                                                                 | BC004092         | 1.26                                  | 0.005                      |
| Hydroxyacyl-coenzyme A dehydrogenase/3-ketoacyl-coenzyme A thiolase/enoyl-coenzyme A hydratase (trifunctional protein), beta subunit | BG866501         | 1.26                                  | 0.01                       |
| Ubiquitin-conjugating enzyme E2R 2                                                                                                   | AV054417         | 1.25                                  | 0.01                       |
| Carnitine palmitoyltransferase 2                                                                                                     | NM_009949        | 1.25                                  | 0.002                      |
| Peroxisomal biogenesis factor 11a                                                                                                    | NM_011068        | 1.25                                  | 0.05                       |
| Malonyl-CoA decarboxylase                                                                                                            | NM_019966        | 1.25                                  | 0.001                      |
| Cellular repressor of E1A-stimulated genes 1                                                                                         | BC027426         | 1.24                                  | 0.03                       |
| Myeloid ecotropic viral integration site-related gene 1                                                                              | BB207647         | 1.24                                  | 0.01                       |
| 2,4-dienoyl CoA reductase 1, mitochondrial                                                                                           | NM_026172        | 1.23                                  | 0.01                       |
| Lipin 1                                                                                                                              | AK014526         | 1.23                                  | 0.001                      |
| Acetyl-coenzyme A acyltransferase 2 (mitochondrial 3-oxoacyl-coenzyme A thiolase)                                                    | AK002555         | 1.23                                  | 0.02                       |
| Cytoplasmic FMR1 interacting protein 2                                                                                               | AK005148         | 1.23                                  | 0.02                       |
| Progesterin and adipoQ receptor family member IX                                                                                     | AV103696         | 1.23                                  | 0.04                       |
| Ly6/neurotoxin 1                                                                                                                     | NM_011838        | 1.21                                  | 0.02                       |

| Gene                                                                                              | Accession Number | Fold change in CARB-fed CONV-D vs. GF | P value (Student's t test) |
|---------------------------------------------------------------------------------------------------|------------------|---------------------------------------|----------------------------|
| Very low density lipoprotein receptor                                                             | NM_013703        | 1.21                                  | 0.05                       |
| Epoxide hydrolase 2, cytoplasmic                                                                  | NM_007940        | 1.21                                  | 0.05                       |
| Tumor necrosis factor receptor superfamily, member 19-like                                        | BB396291         | 1.21                                  | 0.003                      |
| Tumor rejection antigen gp96                                                                      | NM_011631        | 1.2                                   | 0.02                       |
| Arginine-rich, mutated in early stage tumors                                                      | AK014338         | 1.2                                   | 0.05                       |
| Sec61 alpha 1 subunit ( <i>S. cerevisiae</i> )                                                    | BC003707         | -1.21                                 | 0.04                       |
| Nudix (nucleoside diphosphate linked moiety X)-type motif 2                                       | NM_025539        | -1.21                                 | 0.05                       |
| Serine carboxypeptidase 1                                                                         | AK014680         | -1.21                                 | 0.05                       |
| Secreted frizzled-related sequence protein 1                                                      | AK008943         | -1.21                                 | 0.05                       |
| Fibulin 2                                                                                         | BF228318         | -1.23                                 | 0.05                       |
| Actin-related protein 2/3 complex, subunit 1B                                                     | BE979985         | -1.24                                 | 0.04                       |
| Heart and neural crest derivatives expressed transcript 2                                         | NM_010402        | -1.24                                 | 0.005                      |
| Filamin, alpha                                                                                    | BM233746         | -1.24                                 | 0.03                       |
| Actinin, alpha 1                                                                                  | BE853286         | -1.24                                 | 0.05                       |
| Cofilin 1, non-muscle                                                                             | AV148266         | -1.24                                 | 0.03                       |
| Diaphorase 1 (NADH)                                                                               | NM_029787        | -1.25                                 | 0.01                       |
| Matrix-remodelling associated 8                                                                   | BB765827         | -1.25                                 | 0.02                       |
| CD34 antigen                                                                                      | NM_133654        | -1.26                                 | 0.05                       |
| Lysyl oxidase-like 1                                                                              | AF357006         | -1.26                                 | 0.01                       |
| Laminin, alpha 4                                                                                  | BB053010         | -1.27                                 | 0.03                       |
| SWI/SNF-related, matrix-associated, actin-dependent regulator of chromatin, subfamily d, member 2 | NM_031878        | -1.28                                 | 0.02                       |
| Ras homolog gene family, member C                                                                 | NM_007484        | -1.28                                 | 0.05                       |
| Notch gene homolog 2 ( <i>Drosophila</i> )                                                        | AI787996         | -1.28                                 | 0.01                       |
| Sprouty homolog 1 ( <i>Drosophila</i> )                                                           | NM_011896        | -1.29                                 | 0.02                       |
| Biglycan                                                                                          | BC019502         | -1.29                                 | 0.01                       |
| Matrix metalloproteinase 2                                                                        | BF147716         | -1.29                                 | 0.03                       |
| Low density lipoprotein receptor-related protein 1                                                | NM_008512        | -1.29                                 | 0.03                       |
| Sulfatase 1                                                                                       | BB065799         | -1.29                                 | 0.04                       |
| Casein kinase 1, delta                                                                            | NM_139059        | -1.3                                  | 0.002                      |
| Insulin-like growth factor binding protein 7                                                      | AI481026         | -1.3                                  | 0.003                      |
| Uncoupling protein 2 (mitochondrial, proton carrier)                                              | BC012697         | -1.3                                  | 0.04                       |
| Coronin 7                                                                                         | AV025980         | -1.3                                  | 0.04                       |
| Potassium voltage-gated channel, shaker-related subfamily, member 5                               | NM_008419        | -1.31                                 | 0.003                      |
| Destrin                                                                                           | NM_019771        | -1.32                                 | 0.01                       |
| Dermatopontin                                                                                     | NM_019759        | -1.32                                 | 0.03                       |
| Transgelin 2                                                                                      | C76322           | -1.32                                 | 0.01                       |
| Cysteine-rich protein 1 (intestinal)                                                              | NM_007763        | -1.34                                 | 0.02                       |
| Programmed cell death 6 interacting protein                                                       | AJ005074         | -1.34                                 | 0.03                       |
| G protein-coupled receptor kinase 5                                                               | BC019379         | -1.34                                 | 0.0004                     |
| CD9 antigen                                                                                       | NM_007657        | -1.35                                 | 0.03                       |
| Reticulocalbin 3, EF-hand calcium binding domain                                                  | BC025602         | -1.35                                 | 0.01                       |
| Dihydropyrimidinase-like 3                                                                        | AV162270         | -1.35                                 | 0.0048                     |
| Immunoglobulin superfamily containing leucine-rich repeat                                         | NM_012043        | -1.36                                 | 0.02                       |
| Integral membrane protein 2A                                                                      | BI966443         | -1.36                                 | 0.01                       |
| Expressed sequence AA536743                                                                       | BI248354         | -1.36                                 | 0.01                       |
| Polycystic kidney disease 2                                                                       | BB249222         | -1.36                                 | 0.001                      |
| Tetraspan 2                                                                                       | BC007185         | -1.37                                 | 0.03                       |
| procollagen C-proteinase enhancer protein                                                         | NM_008788        | -1.37                                 | 0.001                      |
| Glutamine fructose-6-phosphate transaminase 2                                                     | NM_013529        | -1.38                                 | 0.02                       |
| Annexin A2                                                                                        | NM_007585        | -1.38                                 | 0.005                      |
| Procollagen C-proteinase enhancer protein                                                         | BB250811         | -1.38                                 | 0.001                      |
| Secreted acidic cysteine-rich glycoprotein                                                        | NM_009242        | -1.38                                 | 0.01                       |
| Protein tyrosine phosphatase, nonreceptor type substrate 1                                        | AB018194         | -1.39                                 | 0.05                       |
| Lumican                                                                                           | AK014312         | -1.39                                 | 0.02                       |
| Sulfatase 2                                                                                       | AK008108         | -1.39                                 | 0.003                      |
| Tissue inhibitor of metalloproteinase 2                                                           | M93954           | -1.39                                 | 0.01                       |
| Filamin A-interacting protein 1                                                                   | AV241894         | -1.39                                 | 0.01                       |
| nidogen 1                                                                                         | X14480           | -1.4                                  | 0.02                       |
| Procollagen, type VI, alpha 1                                                                     | NM_009933        | -1.4                                  | 0.0003                     |
| Angiotensin converting enzyme                                                                     | M55333           | -1.4                                  | 0.0004                     |
| Matrix metalloproteinase 2                                                                        | NM_008610        | -1.41                                 | 0.001                      |
| Calsequestrin 1                                                                                   | NM_009813        | -1.41                                 | 0.03                       |

| Gene                                                                                         | Accession Number | Fold change in CARB-fed CONV-D vs. GF | P value (Student's t test) |
|----------------------------------------------------------------------------------------------|------------------|---------------------------------------|----------------------------|
| Cell division cycle 20 homolog ( <i>S. cerevisiae</i> )                                      | NM_023223        | -1.42                                 | 0.03                       |
| Transcribed locus                                                                            | AA266723         | -1.42                                 | 0.04                       |
| Vimentin                                                                                     | M24849           | -1.42                                 | 0.01                       |
| Epimorphin                                                                                   | NM_007941        | -1.43                                 | 0.01                       |
| Cysteine and glycine-rich protein 1                                                          | BF124540         | -1.43                                 | 0.000                      |
| PDZ and LIM domain 5                                                                         | NM_019808        | -1.43                                 | 0.05                       |
| Dynein, cytoplasmic, light chain 1                                                           | NM_019682        | -1.44                                 | 0.003                      |
| A disintegrin-like and metalloprotease (reprolysin type) with thrombospondin type 1 motif, 2 | BM125019         | -1.44                                 | 0.01                       |
| Procollagen, type XIV, alpha 1                                                               | AJ131395         | -1.45                                 | 0.01                       |
| Syndecan 4                                                                                   | BC005679         | -1.45                                 | 0.01                       |
| Thrombospondin 1                                                                             | AI385532         | -1.45                                 | 0.03                       |
| EF hand domain containing 1                                                                  | BC019531         | -1.47                                 | 0.003                      |
| Steroid 5 alpha-reductase 2-like                                                             | BB825787         | -1.47                                 | 0.01                       |
| Cartilage intermediate layer protein, nucleotide pyrophosphohydrolase                        | BE630003         | -1.5                                  | 0.05                       |
| Cytokine inducible SH2-containing protein                                                    | NM_009895        | -1.51                                 | 0.04                       |
| Anthrax toxin receptor 1                                                                     | AF378762         | -1.51                                 | 0.01                       |
| LPS-induced TN factor                                                                        | AV360881         | -1.52                                 | 0.001                      |
| Coatmer protein complex, subunit gamma 2, antisense 2                                        | BE653037         | -1.52                                 | 0.03                       |
| Fibronectin type III domain containing 1                                                     | AK003938         | -1.53                                 | 0.02                       |
| Follistatin-like 1                                                                           | BI452727         | -1.54                                 | 0.01                       |
| Latent transforming growth factor beta binding protein 3                                     | NM_008520        | -1.57                                 | 0.003                      |
| Microfibrillar associated protein 5                                                          | NM_015776        | -1.58                                 | 0.0002                     |
| Procollagen, type XVIII, alpha 1                                                             | D17546           | -1.58                                 | 0.03                       |
| Insulin-like growth factor 2                                                                 | NM_010514        | -1.58                                 | 0.002                      |
| Fatty acid binding protein 5, epidermal                                                      | BC002008         | -1.59                                 | 0.004                      |
| Procollagen, type VI, alpha 2                                                                | BI455189         | -1.59                                 | 0.001                      |
| CD248 antigen, endosialin                                                                    | NM_054042        | -1.6                                  | 0.001                      |
| Periostin, osteoblast specific factor                                                        | BI110565         | -1.62                                 | 0.01                       |
| Latent transforming growth factor beta binding protein 2                                     | NM_013589        | -1.65                                 | 0.05                       |
| Fibrillin 1                                                                                  | NM_007993        | -1.65                                 | 0.001                      |
| Cysteine and glycine-rich protein 2                                                          | NM_007792        | -1.67                                 | 0.02                       |
| Ral guanine nucleotide dissociation stimulator,-like 1                                       | NM_016846        | -1.67                                 | 0.02                       |
| Procollagen, type I, alpha 1                                                                 | U08020           | -1.69                                 | 0.0018                     |
| Myosin, light polypeptide 9, regulatory                                                      | AK007972         | -1.69                                 | 0.03                       |
| Fibronectin 1                                                                                | BC004724         | -1.71                                 | 0.004                      |
| Procollagen, type V, alpha 2                                                                 | AV229424         | -1.74                                 | 0.0002                     |
| Microfibrillar associated protein 5                                                          | NM_015776        | -1.74                                 | 0.004                      |
| S100 calcium binding protein A4                                                              | D00208           | -1.79                                 | 0.001                      |
| Stearoyl-coenzyme A desaturase 2                                                             | BG060909         | -1.8                                  | 0.0001                     |
| Discoidin domain receptor family, member 1                                                   | BB234940         | -1.82                                 | 0.03                       |
| Procollagen, type V, alpha 1                                                                 | AW744319         | -1.85                                 | 0.01                       |
| Matrix metalloproteinase 14 (membrane-inserted)                                              | NM_008608        | -1.94                                 | 0.003                      |
| Actin, alpha 2, smooth muscle, aorta                                                         | NM_007392        | -1.99                                 | 0.001                      |
| Neurotensin                                                                                  | NM_024435        | -1.99                                 | 0.0004                     |
| A disintegrin-like and metalloprotease (reprolysin type) with thrombospondin type 1 motif, 2 | BG073461         | -2.15                                 | 0.002                      |
| Procollagen, type III, alpha 1                                                               | AW550625         | -2.16                                 | 0.004                      |
| Procollagen, type I, alpha 2                                                                 | BF227507         | -2.17                                 | 0.0002                     |
| Elastin                                                                                      | BB229377         | -2.27                                 | 0.01                       |
| Microfibrillar-associated protein 4                                                          | BC022666         | -3.62                                 | 0.003                      |

Table S6. Primer sets used in this study

| Gene          | GenBank accession no. | Primer  | Primer sequences                 | Amplicon size, bp |
|---------------|-----------------------|---------|----------------------------------|-------------------|
| <i>mtCytb</i> | BC004586              | Forward | 5'-CCTTCATACCTCAAAGCAACGA        | 85                |
|               |                       | Reverse | 5'-GATAAGTAGGTTGGCTACTAGGATTCAGT |                   |
| <i>Fgf21</i>  | NM_020013             | Forward | 5'-CCAGATGTGGGCTCCTCTGAC         | 101               |
|               |                       | Reverse | 5'-AGAAACAGCCCTAGATTCAGGAAGAGT   |                   |
| <i>Glut1</i>  | NM_011400             | Forward | 5'-TCGTTGGCATCCTTATTGC           | 91                |
|               |                       | Reverse | 5'-ACGAAGACGACACTGAGCAG          |                   |
| <i>Hmgcs2</i> | NM_008256             | Forward | 5'-TGGTTCAAGACAGGGACACAGAAC      | 98                |
|               |                       | Reverse | 5'-AGAGGAATACCAGGGCCCAACAAT      |                   |
| <i>Rpl32</i>  | NM_172086             | Forward | 5'-CCTCTGGTGAAGCCCAAGATC         | 102               |
|               |                       | Reverse | 5'-TCTGGGTTTCCGCCAGTTT           |                   |
| <i>Oxct1</i>  | NM_024188             | Forward | 5'-TGGCCAAGTGGATGATACCTGG        | 97                |
|               |                       | Reverse | 5'-TCCATGGTGACCACCACCTTTGG       |                   |
| <i>Ppara</i>  | NM_011144             | Forward | 5'-ACTACGGAGTTACGCATGTG          | 76                |
|               |                       | Reverse | 5'-TTGTCGTACACCAGCTTCAGC         |                   |
| <i>Pnp1a2</i> | NM_025802             | Forward | 5'-TACCAGCCAAGCTCCAAGTTGT        | 113               |
|               |                       | Reverse | 5'-GGCTCTATGTCCTCATTCCACAGCAT    |                   |
